1 Title:

2 The origin of a new chromosome in gerbils

3

4 Authors:

5 Thomas D. Brekke<sup>1</sup>, Alexander S. T. Papadopulos<sup>1</sup>, Eva Julià<sup>2</sup>, Oscar Fornas<sup>3,2</sup>, Beiyuan Fu<sup>4</sup>,

6 Fengtang Yang<sup>4,5</sup>, Roberto de la Fuente<sup>6</sup>, Jesus Page<sup>7</sup>, Tobias Baril<sup>8</sup>, Alexander Hayward<sup>8</sup>,

7 John F. Mulley<sup>1</sup>

8

9 Affiliations:

10 1. School of Natural Sciences, Bangor University, Bangor, Gwynedd, LL57 2DG, United

11 Kingdom;

12 2. Centre for Genomic Regulation (CRG), Barcelona, Spain

13 3. Pompeu Fabra University (UPF), Barcelona, Spain.

14 4. Wellcome Sanger Institute, Hinxton, Cambridge, UK;

15 5. Current Address: School of Life Sciences and Medicine, Shandong University of Technology,

16 Zibo, Shandong, China

17 6. Department of Experimental Embryology, Institute of Genetics and Animal Biotechnology of

18 the Polish Academy of Sciences, Jastrzębiec, 05-552 Magdalenka, Poland;

19 7. Departamento de Biología, Facultad de Ciencias, Universidad Autónoma de Madrid, 28049,

20 Madrid, Spain;

21 8. University of Exeter, Penryn Campus, Cornwall, TR10 9FE, United Kingdom.

22

23 To whom correspondence should be addressed: [j.mulley@bangor.ac.uk](mailto:j.mulley@bangor.ac.uk)

24

25 Keywords: Meriones, genome, karyotype, GC biased gene conversion, chromosome evolution

26

27

28

29

30 **Abstract**

31 Gerbil genomes have both an extensive set of GC-rich genes and chromosomes strikingly  
32 enriched for constitutive heterochromatin. We sought to determine if there was a link between  
33 these two phenomena and found that the two heterochromatic chromosomes of the Mongolian  
34 gerbil (*Meriones unguiculatus*) have distinct underpinnings: chromosome 5 has a large block of  
35 intra-arm heterochromatin as the result of a massive expansion of centromeric repeats  
36 (probably due to centromeric drive); while chromosome 13 is comprised of extremely large  
37 (>150kb) repeated sequences. We suggest that chromosome 13 originated when a functionally  
38 important 'seed' broke off from another chromosome and underwent multiple breakage-fusion-  
39 bridge cycles. Genes with the most extreme GC skew are encoded on this chromosome, most  
40 likely due to the restriction of recombination to a narrow permissive region (since GC bias is  
41 linked with recombination-associated processes). Our results demonstrate the importance of  
42 including karyotypic features such as chromosome number and the locations of centromeres in  
43 the interpretation of genome sequence data, and highlight novel patterns involved in the  
44 evolution of chromosomes.

45

46

47

48

49

50

## 51 **Introduction**

52           The nucleotide composition of genomes is not homogenous; varying between  
53 chromosomes, individuals, populations, and species (Eyre-Walker and Hurst 2001). Variation in  
54 the distribution of guanine (G) and cytosine (C) bases is heavily determined by the  
55 recombination-associated process of GC-biased gene conversion (gBGC), which favours  
56 fixation of guanine and cytosine over adenine (A) and thymine (T) (Lamb 1984; Arbeithuber et  
57 al. 2015). Over evolutionary time, this process results in a GC bias around recombination  
58 hotspots, that is not driven by selection (Galtier et al. 2001). Gerbils and their relatives have  
59 multiple extensive regions of extremely high GC bias within their genomes, higher than that  
60 seen in any other mammal (Hargreaves et al. 2017; Dai et al. 2020; Pracana et al. 2020).  
61 Historically, this has complicated attempts to obtain high-quality contiguous gerbil genome  
62 assemblies (Leibowitz et al. 2001; Gustavsen et al. 2008). Intriguingly, there appear to be two  
63 distinct patterns of GC skew in gerbils: (i) a region associated with the ParaHox cluster and the  
64 surrounding genes, where virtually all genes in this region have extremely high mutation rates  
65 and a marked bias towards weak-to-strong A/T to G/C substitutions, and (ii) a further set of 17  
66 large clusters of GC-rich genes also with high mutation rates that are slightly biased towards  
67 weak-to-strong A/T to G/C substitutions (Pracana et al. 2020). These intriguing characteristics of  
68 gerbil genomes make them an ideal system in which to examine the association between GC  
69 biased gene conversion and the organization of eukaryotic genomes.

70           In addition to these GC-skewed regions, gerbil genomes possess distinctive karyotypic  
71 features where one or more chromosomes with extensive regions of heterochromatin or that  
72 appear fully heterochromatic, showing as entirely dark in C-banding stains (Gamperl and  
73 Vistorin 1980) or coated by heterochromatin histone marks in immunofluorescence assays (de  
74 la Fuente et al. 2014). Chromatin state is an important mechanism for the regulation of gene  
75 activity. Facultative heterochromatin is cell-type-specific and may be converted to open, active

76 euchromatin during gene regulatory processes. In contrast, constitutive heterochromatin is  
77 marked by tri-methylation of histone H3 at the lysine 9 residue (H3K9me3) (Saksouk et al.  
78 2015), and comprises densely compacted, gene-poor inactive regions of the genome which are  
79 condensed in all cell types at all developmental stages, such as centromeres and telomeres  
80 (Saksouk et al. 2015; Penagos-Puig and Furlan-Magaril 2020). Many gerbil species (Family  
81 Gerbillidae) have chromosomes with high levels of constitutive heterochromatin, though the  
82 specific chromosome and extent of heterochromatin vary by species. In Mongolian gerbils  
83 (*Meriones unguiculatus*), nearly a third of chromosome 5 and all of chromosome 13 appear to  
84 be composed of constitutive heterochromatin (Gamperl and Vistorin 1980). The genomes of the  
85 North African Gerbil (*Gerbillus campestris*), the hairy-footed gerbil (*Gerbilliscus paeba*), and the  
86 fat sandrat (*Psammomys obesus*) all contain a single heterochromatic chromosome (Solari and  
87 Ashley 1977; Gamperl and Vistorin 1980; Knight et al. 2013).

88         The heterochromatic chromosomes in gerbils are present in all individuals examined to  
89 date and do not meet the criteria for classification as B chromosomes: i.e.: they are not non-  
90 essential, and do not vary in copy number among individuals and tissues without an adverse  
91 impact on fitness (Ahmad and Martins 2019). These chromosomes therefore provide a unique  
92 system to examine the impact of their heterochromatic state on genic evolution and particularly  
93 whether it is linked to the extensive number of GC-rich genes in gerbil genomes.

94 Heterochromatin is typically gene-poor (Dimitri et al. 2005) and transcriptionally repressed  
95 (Grewal and Moazed 2003; Dillon 2004). This makes it unlikely that entire heterochromatic  
96 chromosomes would be maintained and transmitted across generations for millions of years if  
97 they did not encode any genes or are entirely selfish independent genetic elements. High GC%  
98 in certain gerbil genes could be an adaptation to a transcriptionally-repressive environment.  
99 Genes with high GC% in their coding regions and adjacent regions of DNA, and especially  
100 those with high GC% in the 3<sup>rd</sup> codon position (GC<sub>3</sub>) can show elevated expression (Lercher et  
101 al. 2002; Vinogradov 2005). Conversely, since gBGC is a recombination-dependent process,

102 and since all chromosomes must undergo at least one reciprocal recombination event  
103 (crossover) with their homologue during meiosis (Lydall et al. 1996), an alternative hypothesis is  
104 that the extreme GC% present in some gerbil genes is a consequence their becoming  
105 entrapped in or near a recombination hotspot. If the bulk of the extensive heterochromatin  
106 observed on these gerbil chromosomes is non-permissive to recombination, then genes in those  
107 regions where recombination can occur will become increasingly GC-rich because of continual  
108 exposure to gBGC. We may therefore reasonably expect a link between GC-rich genes and  
109 these unusual gerbil chromosomes.

110 A key question is how did fully heterochromatic chromosomes in gerbils arise? They may  
111 once have been “normal” chromosomes that have degenerated into gene-poor, non-functional,  
112 or silenced chromosomes by accumulation of repetitive DNA. Alternatively, they may have  
113 formed from heterochromatic pieces that broke off from other chromosomes, in the same way  
114 that the neochromosomes of tumours (Garsed et al. 2009, 2014) and some B chromosomes  
115 (Camacho et al. 2000; Dhar et al. 2002) develop from fragments of other chromosomes.  
116 Alternatively they could be the duplicate of another chromosome, which condensed into  
117 heterochromatin a mechanism of dosage compensation in the same way that additional copies  
118 of X chromosomes are inactivated in female mammals. Finally, they may potentially perhaps  
119 have grown from a smaller chromosomal “seed”, which broke off from another chromosome,  
120 and subsequently grew by repeated segmental duplication.

121 Until very recently, questions such as those posed above could not have be addressed  
122 in a non-model system for a several key reasons. A particularly important issue was the  
123 difficulties that short read-based genome sequencing approaches face regarding the assembly  
124 of GC%-rich regions (Hron et al. 2015; Bornelöv et al. 2017; Botero-Castro et al. 2017; Tilak et  
125 al. 2018; Yin et al. 2019). Meanwhile, the current trend towards the generation of chromosome-  
126 scale assemblies has perhaps lost sight of the importance of an understanding of the karyotype

127 of the species being studied, and of physically linking genome sequence to identified  
128 chromosomes.

129         Using a new chromosome-scale genome assembly for the Mongolian gerbil and  
130 methods enabling us to assign the genomic scaffolds to physical chromosomes, we test (i)  
131 whether GC-rich gene clusters correlate with recombination hotspots and (ii) if those genes are  
132 associated with a single heterochromatic chromosome. Our approach allows us to examine the  
133 origin and propose a new hypotheses for the evolution of some unusual and possibly unique,  
134 heterochromatic gerbil chromosomes.

135

## 136 **Results and Discussion**

137 Gerbil genome: approach and summary statistics

138         We sequenced and assembled the genome of the Mongolian gerbil, *Meriones*  
139 *unguiculatus* into 245 contigs using PacBio HiFi reads and scaffolded OmniC chromatin  
140 conformation capture data (Figure S1), Oxford Nanopore long and ultra-long read sequence  
141 data, a genetic map (Table S1) (Brekke et al. 2019), and BioNano optical mapping. We  
142 assigned scaffolds to chromosomes by flow-sorting chromosomes into pools and using these  
143 pools to generate short-read sequences and paint probes for FISH. Alignments of short reads  
144 from pools to scaffolds and FISH probes were used to link scaffolds with physical (Supplemental  
145 Material 1). The final genome assembly contains 194 scaffolds spanning 21 autosomes and the  
146 X and Y sex chromosomes, and the mitochondrial genome. For 20 of the 23 chromosomes, a  
147 single large scaffold contains over 94% (often over 99%) of all the sequence assigned to that  
148 chromosome. Only chromosome 13, with 121 scaffolds, and the X and Y chromosomes, each  
149 with 6 scaffolds, are appreciably fragmented (Figure 1). The assembly was annotated using  
150 RNAseq data and is 92% complete based on a BUSCO analysis (Complete:92.3% [Single-

151 copy:91.7%, Duplicated:0.6%], Fragmented:1.7%, Missing:6.0%, n:13798) (Manni et al. 2021).  
152 Entropy and linguistic complexity identified centromeres and two outlier chromosomes: one with  
153 an extensive region of low complexity, and one with an overall homogenous level of complexity  
154 (Figure 3).

155 Two *M. unguiculatus* genome sequences have been previously published, based on  
156 short-read sequence data (Cheng et al. 2019; Zorio et al. 2019), both contain hundreds of  
157 thousands of contigs and equally large numbers of scaffolds (Table S2). One of these has  
158 recently been improved with Hi-C data ([www.DNAZoo.org](http://www.DNAZoo.org)) into 22 chromosome-length  
159 scaffolds, and ~300,000 additional scaffolds (Cheng et al. 2019). Full-genome alignments  
160 between our genome assembly and the Hi-C assembly (Figure S3) showed that most scaffolds  
161 are colinear between the assemblies but that the improved Cheng et al. (Cheng et al. 2019)  
162 assembly does not include chromosome 13. Our highly contiguous and physically associated  
163 assembly provides the foundation for all subsequent analyses.

#### 164 The location of GC-rich genes

165 A set of over 380 genes with extreme GC content clustered in the genomes of sandrats  
166 and gerbils have previously been identified. It has been hypothesized that biased gene  
167 conversion has driven their GC content to extraordinary levels since they are near  
168 recombination hotspots (Pracana et al. 2020), but the resources to test this were not available  
169 so mouse gene locations had been used as an evolutionarily-informed proxy for the location of  
170 those genes in gerbils. Here we use our newly-generated chromosome-scale assembly to  
171 explicitly test how these GC-rich genes are distributed across gerbil chromosomes. We used a  
172 permutation test to show that GC-rich genes are clustered together more than is expected by  
173 chance (Figure 4A; permutation test, n=1,000,000 permutations,  $p < 0.000001$ ). We used our  
174 genetic map (Brekke et al. 2019) to locate recombination hotspots which were defined as  
175 regions with 5x higher recombination rate than the genome average (as per (Katzner et al. 2011)).



176 Hotspots were found on 18 of 22 chromosomes (21 autosomes and the X chromosome, we omit  
177 the Y chromosome here as it does not recombine) with  $2.4 \pm 2.2$ (sd) hotspots per chromosome  
178 (Figure 4B, Figure S4, S5). Chromosomes 2, 18, 21, and the X chromosome were found to lack  
179 recombination hotspots. We tested proximity of GC-rich genes to hotspots in two ways, first by  
180 comparing the GC-rich genes with the entire gene set (Figure 4C) and secondly by performing a  
181 permutation test (Figure 4D). In both cases, GC outlier genes were found to lie significantly  
182 closer to recombination hotspots than expected by chance (Figure 4C: t-test,  $df = 383.2$ ,  $t =$   
183  $2.585$ ,  $p = 0.01012$ ; Figure 4D: permutation test,  $n = 1,000,000$ ,  $p < 0.000001$ ). These results  
184 demonstrate a clear association of GC rich gene clusters with recombination hotspots as  
185 expected under gBGC.

186         While a genetic map shows the location of current recombination hotspots, hotspots  
187 move through evolutionary time due to large-scale chromosomal rearrangements and the  
188 mutational load caused by crossing over (Paigen and Petkov 2010; Tiemann-Boege et al.  
189 2017). Consequently, we next tested whether GC outliers are associated with proxies of  
190 ancestral hotspots. Recombination rate is not uniform across a chromosome and is typically  
191 higher near the telomeres (Nachman 2002; Martinez-Perez and Colaiácovo 2009), thus we  
192 tested whether GC outliers are correlated with position along the chromosome arm (Figures 4E  
193 and 4F). We found that whether considering the full distribution of gene locations or 1,000,000  
194 draws of the same number of random genes in a permutation test, the GC outliers are found to  
195 lie much closer to the telomere than expected by chance (Figure 4E: t-test,  $df = 418$ ,  $t = -14.26$ ,  
196  $p < 0.000001$ ; Figure 4F: permutation test,  $n=1,000,000$ ,  $p < 0.000001$ ). Furthermore, gerbils  
197 have many interstitial telomere sites (de la Fuente et al. 2014) which are caused by  
198 chromosomal fusions embedding what was an ancestral telomere within a chromosome arm,  
199 typically near the centromere. Thus, interstitial telomere repeats are proxies for the ends of  
200 ancestral chromosomes and their associated ancient recombination hotspots. We therefore

201 tested whether GC outlier genes are closer to telomere repeats (interstitial or otherwise) than  
202 expected by chance and found that they are (Figure 4G: t-test,  $df = 418.6$ ,  $t = 7.876$ ,  $p=0$ ; Figure  
203 4H: permutation test,  $n=1,000,000$ ,  $p=0$ ). In short, GC outlier genes are found in clusters across  
204 the genome and are nearer to recombination hotspots (current or ancient) and  
205 telomere/interstitial telomere sites than expected by chance, strongly supporting the hypothesis  
206 that GC-biased gene conversion is driving the extreme GC content of these genes.

207           However, we did not find that all GC-rich genes are located on heterochromatic  
208 chromosomes and find instead that they are distributed on the order of  $19.5 \pm 13.7$  GC-rich  
209 genes per chromosome across the genome. The tendency for genes to become highly GC-rich  
210 in and around recombination hotspots in gerbils therefore seems unrelated to their unusual  
211 chromosomes and may instead be the result of greater recombination hotspot stability, where  
212 hotspots stay in one place for longer in gerbils compared to other species. Similarly stable  
213 hotspot location has previously been reported for birds (Singhal et al. 2015) though in birds the  
214 absence of PRDM9 correlates with greater hotspot stability. The gerbil genome encodes a full-  
215 length *Prdm9* gene on chromosome 20, and so this hotspot stability in gerbils must arise via  
216 some other mechanism.

217           We next sought to understand the genomic basis of the heterochromatic appearance of  
218 the chromosomes 5 and 13 in *M. unguiculatus*.

219

#### 220 *Chromosome 5: the relevance of centromeric drive*

221 Relatively little is known about centromere organization in non-model species, as centromeres  
222 are comprised of extensive runs of repeated sequences, which short-read technologies (and  
223 even Sanger sequencing) have struggled to cross. It is only this year that we finally obtained full  
224 coverage of human centromeres, from a mixture of long-read sequencing approaches applied to

225 the genome of a hydatidiform mole cell line by the Telomere-to-Telomere (T2T) consortium  
226 (Altemose et al. 2022). Our high-quality PacBio HiFi-derived sequence data allowed us to fully  
227 span the centromeres of all *M. unguiculatus* chromosomes, which in all cases correlated with  
228 regions of low complexity in linguistic complexity plots. We used NTRprism (Altemose et al.  
229 2022) to identify four different simple repeat sequences found in gerbil centromeres (Figure S6)  
230 which we have termed MsatA (for *Meriones satellite A*), MsatB, MsatC, and MsatD (Figure 2A):  
231 MsatA is 6bp long and has the sequence TTAGGG which is the same simple sequence repeat  
232 found in telomeres, MsatB is 37bp long, MsatC is 127bp long, and MsatD is 1,747bp long and is  
233 only found on the Y chromosome.

234         Copies of Msats are arranged into one of four variant arrays which define an  
235 intermediate-order structure in the centromeres (Figure 2B). 'B arrays' are formed from copies  
236 of MsatB and range in size from 1Mbp to 3Mbp long (~30,000 to ~100,000 copies). Similarly,  
237 the Y chromosome centromere is a 'D array' comprised of ~500 copies of MsatD spanning  
238 slightly less than a megabase. MsatA and MsatC repeats are rarely found alone, tending  
239 instead to intersperse with each other to form 'A-C arrays'. Typically 10-50 copies of MsatA will  
240 alternate with 5-10 copies of an MsatC unit, and this alternating pattern will extend for between  
241 100Kb and 1Mb depending on the chromosome. The only place that MsatC are found without  
242 interspersed copies of MsatA is on the X chromosome in what we term a 'C array'. While not  
243 interspersed with MsatC, there are a number of MsatA repeats that do appear at both ends of  
244 the X centromere (Figure 2D, for a high resolution image see Supplemental Material 3) and are  
245 detectable by FISH (de la Fuente et al. 2014). The orientation of the Msat repeats is typically  
246 consistent across an array, however some arrays are composed of blocks of Msat repeats in  
247 alternating orientations with many copies of repeat in the forward orientation followed by many  
248 copies in the reverse orientation.

249           The highest-level of centromere organization is characterized by groups of between one  
250 and three arrays which fall into one of a few patterns which we term ‘simple’, ‘asymmetric’, or  
251 ‘symmetric’ (Figure 2C). Simple centromeres are comprised of a single A-C array and are  
252 present in ten of the smaller metacentric chromosomes (see chromosomes 3, 5, 6, 8-12, 15,  
253 and 16, Figure 2D). The metacentric Y chromosome also has a simple centromere, though with  
254 a D array instead of the A-C array. Asymmetric centromeres are comprised of two arrays, one of  
255 which is always a B array and the other is typically an A-C array. Eight autosomes fall into this  
256 category including all four of the small telocentric chromosomes (chromosomes 18-21, Figure  
257 2D), three of the metacentric chromosomes (chromosomes 4, 7, and 14, Figure 2D), and one  
258 acrocentric chromosome (chromosome 17, Figure 2D). The metacentric X chromosome also  
259 has an asymmetric centromere but is the only location in the genome where a pure C array  
260 exists. Finally, symmetric centromeres are comprised of three arrays: a C array sandwiched  
261 between two A-C arrays and are found in the metacentric chromosomes 1, and 2, and the  
262 acrocentric chromosome 13. Many centromeres also contain 10Kbp–50Kbp blocks of non-  
263 repetitive, complex DNA both between and within the various arrays (see Figure 2D).

264           Chromosome 5 is characterized by an enormous centromeric repeat expansion which is  
265 visible as a dark band on the q arm (Figure 2D). Our data shows that the repeat expansion is a  
266 29Mb long B array, which comprises approximately 22% of the entire chromosome. This repeat  
267 expansion is distinct from the centromere which is a simple A-C array 1.5Mb long. In contrast to  
268 the B arrays in the centromeres of other chromosomes, the orientation of MsatB repeats on  
269 chromosome 5 switches far more frequently. With a few exceptions, B arrays in centromeres  
270 maintain their orientation across the entire array, or in the case of the symmetric centromeres,  
271 have a few large blocks in opposite orientations; the centromeric B arrays maintain orientation  
272 for 1-3Mb. Repeats in the chromosome 5 expansion however, switch orientation over 200 times  
273 across the 29Mb, so the average block length is just 140Kb.

274           There is a similar large expansion of a centromeric repeat found in human chromosome  
275 9 (Altemose et al. 2022). However, while it is similar in size to the expansion on gerbil  
276 chromosome 5, the human expansion is polymorphic in the population (Craig-Holmes and Shaw  
277 1971). The dark band on the q arm of gerbil chromosome 5 is visible in all published karyotypes  
278 dating back to the 1960s which derive from many different individuals and laboratory colonies  
279 (Pakes 1969; Weiss et al. 1970; Gamperl and Vistorin 1980) suggesting that in contrast, the  
280 gerbil expansion is fixed at this massive size.

281           The repeat expansion is absent in karyotypes of many closely related Gerbillinae  
282 species, including representatives from the genera *Desmodilus*, *Gerbillurus*, *Gerbillus*, *Tatera*,  
283 and *Taterillus*, and is even absent in other species of *Meriones*. (Gamperl and Vistorin 1980;  
284 Benazzou et al. 1982, 1984; Qumsiyeh 1986b,a; Dobigny et al. 2002; Aniskin et al. 2006;  
285 Volobouev et al. 2007; Gauthier et al. 2010). The expansion is also absent in the sequenced  
286 genome assemblies of the closely related fat sandrat (*Psammomys obesus*) and fat-tailed gerbil  
287 (*Pachyuromys duprasi*). Alignment with the *Psammomys* genome assembly shows that the  
288 location of the repeat expansion on *M. unguiculatus* chromosome 5 is homologous to the  
289 *Psammomys* chromosome 10 centromere (Figure S7), suggesting that the region in *M.*  
290 *unguiculatus* is an ancestral centromere that has expanded. The centromere-drive hypothesis  
291 (Malik 2009) may explain the distribution of array types in the autosomal centromeres under the  
292 following model: the ancestral gerbil centromeres were predominately B arrays and at some  
293 point after the *Meriones* – *Psammomys* split, centromeric drive triggered a massive repeat  
294 expansion of the B array on what would become *Meriones* chromosome 5. This runaway  
295 expansion was the catalyst for genome-wide centromere turnover, where A-C arrays replaced B  
296 arrays as the new functional centromeres and many B arrays were evolutionarily lost, with those  
297 that remained being non-functional relics. Indeed, the centromere expansion on chromosome 5  
298 does not bind CENT proteins, although it preserves other heterochromatic marks, (such as

299 H3K9me3) and excludes recombination events, as assessed in male meiosis by the localization  
300 of the recombination marker MLH1 (Figure 6). While the heterochromatic state of a large portion  
301 of chromosome 5 can therefore be explained by the massive expansion of a centromeric repeat,  
302 this is not the case for chromosome 13 (Figure 3).

303

#### 304 *Chromosome 13: origin of a new autosome*

305 Chromosome 13 is the most unusual chromosome in the gerbil genome for a variety of  
306 reasons. Karyotypically, it stains very dark and appears heterochromatic in G (Figure 2D) and  
307 C-banding images (Gamperl and Vistorin 1980). It also displays delayed synapsis during the  
308 first meiotic prophase, when compared to all other chromosomes (de la Fuente et al. 2007,  
309 2014). On a technical level, it is the only chromosome that failed to assemble into a single  
310 chromosome-length scaffold (Figure 1), and even optical mapping was unable to improve the  
311 assembly. In a phylogenetic context there is no ortholog of chromosome 13 in mouse and rat,  
312 but similarity in G-banding patterns suggests that it may share ancestry with chromosome 14 in  
313 the fat sandrat (*P. obesus*). Short reads assigned to chromosome 13 have very low mapping  
314 quality as they map to multiple locations. As a result, chromosome 13 has very few genetic  
315 markers and a very short relative genetic map length compared to the other chromosomes  
316 (Table S1) and we suspect this is what prevented the OmniC data and HiRise pipeline from  
317 successfully assembling this chromosome. The centromere of chromosome 13 is unique in that  
318 the A-C arrays have more non-repetitive blocks interspersed within them than the other  
319 chromosomes (Figure 2D), and in terms of sequence complexity, there is no fine-scale variation  
320 in entropy across the chromosome (Figure 3) as on the other autosomes, suggesting very low  
321 sequence diversity. Indeed, the entropy of chromosome 13 appears even more homogenous  
322 than that of the Y chromosome (Figure 3). Chromosome 13 has more than the expected  
323 number of genes based on its size (Figure 5A), but far fewer unique genes (Figure 5B),

324 demonstrating high levels of gene duplication: of the 1,990 genes on chromosome 13 annotated  
325 as something other than “Protein of unknown function”, 566 are copies of a viral *pol* protein (and  
326 so represent either endogenous retrovirus or LET retrotransposon sequences), 406 are *Vmn2r*  
327 (olfactory receptor) genes (of which 337 are copies of *Vmn2r116*) and 331 are *Znf* (Zinc finger)  
328 genes (257 of which are *Znf431*). There are more GC-rich genes located on chromosome 13  
329 than expected based on its size (Figure 5C) and Chromosome 13 houses the original high-GC  
330 cluster (including the ParaHox genes) identified by (Hargreaves et al. 2017; Pracana et al.  
331 2020). Chromosome 13 has a far higher repetitive sequence content (Figure 5D), as measured  
332 by the EarlGrey pipeline (Baril et al. 2022) which is clearly visible in comparison with other  
333 chromosomes in a self-alignment plot (Figure 5E-M). In fact, after filtering out alignments under  
334 1,000bp, over 93% of bases on chromosome 13 are found in multiple copies on the  
335 chromosome, compared with ~10% on other autosomes (e.g. 11.5%, 8.2%, and 12.7% on the  
336 similarly sized chromosomes 10, 11, and 12 respectively). The bulk of chromosome 13 consists  
337 of around 400 copies of a block of DNA 170kb long, the periodicity and variable orientation of  
338 which can easily be seen in Figures 5H, 5I, and 5J. While we find no evidence of a link between  
339 high GC% genes and this chromosome generally, chromosome 13 does encode the set of  
340 genes with the highest substitution and weak-to-strong mutation rates that were previously  
341 identified as being the most extreme outliers in gerbil and sandrat genomes (Pracana et al.  
342 2020). These are a set of linked genes surrounding the ParaHox gene cluster, including *Pdx1*,  
343 *Cdx2*, *Brca2* and others crucial for proper embryogenesis and cell function (Withers et al. 1998).  
344 The cluster is contained within an ancient genomic regulatory block (Kikuta et al. 2007), where  
345 genes are locked together by the presence of overlapping regulatory elements. While there is a  
346 1 in 23 possibility of these genes being on this chromosome by chance (1 in 21 for autosomes),  
347 the presence of the most unusual genes on the most unusual chromosome is highly suggestive  
348 of a causative link.

349           We propose the following model to explain the origin of chromosome 13 and the extreme  
350 GC-skew of many of its genes: a chromosomal fragment approximately 5 million bases long  
351 which included the ParaHox cluster (Hargreaves et al. 2017) broke off from an ancestral  
352 chromosome perhaps during a genome rearrangement. The ParaHox and neighboring genes  
353 are crucially important during development and so could not be lost altogether. For example:  
354 *Pdx1*<sup>-/-</sup> mice die shortly after birth (Jonsson et al. 1994; Offield et al. 1996) as do those lacking  
355 *Brca2* (Evers and Jonkers 2006), *Insr* (Accili et al. 1996), or *Hmgb1* (Calogero et al. 1999)  
356 function; *Cdx2*<sup>-/-</sup> mice die within the first 5 or 6 days of development (Chawengsaksophak et al.  
357 1997); 75% of *Gsx1*<sup>-/-</sup> mice die within 4 weeks of birth, and none live beyond 18 weeks (Li et al.  
358 1996); and *Flt1*<sup>-/-</sup> mice die *in utero* (Fong et al. 1995). These are just a small selection of genes  
359 in this region, but they demonstrate the selective pressure(s) that must exist for its maintenance  
360 within the genome. While the simplest option might have been for this fragment to have joined  
361 onto or into another chromosome, this does not appear to have happened, and instead we  
362 propose that this chromosomal fragment became the seed for the growth of an entirely new  
363 chromosome. In some species, the evolutionary fate of such a fragment may be long-term  
364 persistence as a microchromosome: a small, gene-dense, repeat-poor, GC-rich chromosome of  
365  $\leq 30$  Mb with a high recombination rate. But while microchromosomes are common in birds,  
366 reptiles, and fish, they do not persist in mammals over evolutionarily time (Srikulnath et al. 2021;  
367 Waters et al. 2021). Efficient transmission of mammalian chromosomes between generations  
368 and into daughter cells therefore seems to require a minimum size, and in the case of *M.*  
369 *unguiculatus* chromosome 13, we suggest that the fragment grew rapidly via a breakage-fusion-  
370 bridge mechanism, (McClintock 1938, 1941; Bignell et al. 2007; Campbell et al. 2010;  
371 Greenman et al. 2012), where the chromatid ends without a telomere fuse, and then are pulled  
372 apart at anaphase, breaking randomly and resulting in long inverted repeats, as apparent in our  
373 chromosome 13 self-alignments (Figure 5G, 5H, 5I). In this way, a 170 kb region at the end of  
374 the chromosome was repeatedly duplicated, at multiple scales, until a 107 Mb chromosome was



375 formed. The high similarity of these duplicated regions explains our difficulty in assembling this  
376 chromosome, the multimapping of short reads, and the failure of BioNano optical mapping to  
377 improve our assembly. Previous authors (Gamperl and Vistorin 1980) have described that  
378 chromosome 13 forms ring-like structures during meiosis, suggesting that the bulk of the  
379 heterochromatic material on this chromosome does not, or possibly cannot, form chiasma, and  
380 therefore cannot undergo recombination. However, based on localization of the recombination  
381 marker MLH1, we have found evidence of recombination during male meiosis (Figure 6).  
382 Bivalent chromosome 13 presents a recombination event in most spermatocytes, although a  
383 small proportion (around 23%) lack MLH1 foci. Strikingly, MLH1 are not evenly distributed along  
384 this chromosome, as previously reported for other chromosomes (de la Fuente et al. 2014).  
385 Instead, recombination events are strongly concentrated at the chromosome ends. We therefore  
386 propose that the extreme GC skew of the ParaHox-associated genes in gerbils is the result of  
387 the inability of recombination hotspots to move out of this genomic region, leading to runaway  
388 GC-bias.

## 389 Conclusion

390 The two heterochromatin-rich chromosomes of Mongolian gerbils have distinct origins.  
391 Chromosome 5 has undergone a massive expansion of a centromeric repeat, most likely as a  
392 result of meiotic drive, and chromosome 13 has arisen *de novo* from an initially small seed via  
393 multiple breakage-fusion-bridge cycles. These results show the importance of karyotypic  
394 knowledge of study species and serve as a warning for large-scale genome sequencing  
395 programs such as the Vertebrate Genomes Project (VGP) or the Darwin Tree of Life Project  
396 (DTOL) that we must not neglect knowledge of chromosome number and morphology. Had we  
397 not known the diploid chromosome number for *M. unguiculatus*, and had we not performed  
398 chromosome sorting and FISH, we likely would have binned the 121 fragments corresponding  
399 to chromosome 13 into the “unknown” category and deduced that gerbils had one fewer

400 chromosome than they actually have. We applied what are becoming the standard approaches  
401 for genome sequencing and assembly to the *M. unguiculatus* genome (PacBio HiFi, chromatin  
402 conformation capture, Oxford Nanopore long reads, and Bionano optical mapping), and  
403 incorporated chromosome sorting, FISH, and a SNP-based linkage map, and were still unable  
404 to assemble chromosome 13 into a single scaffold. The huge size and high similarity of the  
405 chromosome 13 repeats suggest that only ultra-long Oxford Nanopore reads, on the order of  
406 several hundred kilobases, might be able to achieve the telomere-to-telomere coverage of this  
407 enigmatic chromosome.

408

409

410

## 411 **Methods**

### 412 Animal care and tissue collection

413 Male Tumblebrook Farm strain Mongolian gerbils from the colony at Bangor University  
414 (Brekke et al. 2018) were euthanised using a Schedule 1 method in accordance with EU  
415 Directive 2010/63/EU and the Animals (Scientific Procedures) Act 1986. Animal use was  
416 reviewed and approved by the Bangor University Animal Welfare and Ethical Review Board.  
417 Fresh liver, kidney, and testis were dissected and snap-frozen in liquid nitrogen, then stored at -  
418 80°C and whole spleens were dissected into pre-warmed RPMI 1640 buffer (ThermoFisher) for  
419 cell culture. Whole blood was collected into EDTA tubes (BD Sciences 366450) and stored at  
420 4°C until shipping.

### 421 Cell culture and chromosome sorting

422 For complete experimental details and methods see “Supplemental Material A  
423 Chromosome Sorting and FISH”. In brief, chromosomes were harvested from the gerbil fibroma  
424 cell line IMR-33 (ECACC General Cell Collection catalogue number 96020931) after being  
425 arrested in mitosis with Colcemid. The cells were lysed in a hypotonic solution and the  
426 chromosomes in suspension were sorted using a BD Influx cell sorter (Becton Dickinson, San  
427 Jose, CA) as described by (Kuderna et al. 2019). 17 separate clusters were identified and the  
428 used for sorting resulting in 6 pools with two chromosomes each and 11 pools with a single  
429 chromosome. After chromosomes were sorted, we dialysed each pool using a Pur-A-Lyzer Maxi  
430 Dialysis kit (Sigma, PURX50005-1KT) following the manufacturer's instructions to remove any  
431 dye that remained bound to the DNA from sorting.

### 432 DNA and RNA Sequencing

433 PacBio HiFi sequencing was performed by the Earlham Institute (Norwich, UK), using  
434 DNA extracted from frozen liver tissue. High molecular weight DNA was extracted with the

435 Nanobind Tissue kit (Circulomics), with quality assessed using an Agilent FEMTO-Pulse, with  
436 size selection of fragments between 18Kb and 19Kb in size with a SageELF. HiFi sequencing  
437 used 3 SMRT cells on a PacBio Sequel II, analysed with the CCS analysis pipeline  
438 (SRR18362962). We sequenced 88,071,091,902 base pairs and generated 4,814,749 CCS  
439 reads with a quality greater than or equal to Q20. These had an average length of 18,291bp and  
440 amount to 34x coverage.

441 OmniC sequencing was performed by Dovetail Genomics (California, USA), using DNA  
442 derived from frozen liver samples. 262,974,243 pairs of 151bp OmniC reads were sequenced  
443 (SRR18362944) corresponding to 38x coverage.

444 Whole fresh blood was sent to the DeepSeq facility (Nottingham, UK) for Oxford  
445 Nanopore PromethION sequencing and BioNano Optical Mapping. DNA was extracted in  
446 parallel with the Circulomics UHMW DNA extraction protocol (EXT-BLU-001) for PromethION  
447 sequencing and the Circulomics HMW DNA Extraction Protocol (EXT-BLH-001) for BioNano  
448 optical mapping. We sequenced 1,210,550 ultra-long reads of average length 39387bp and  
449 2,550,000 long reads averaging 19,850bp via the PromethION (SRR18362939).

450 The sorted chromosomes were sequenced with Illumina MiSeq at Bangor University,  
451 and we generated 19,764,484 read pairs of 151bp paired end reads (SRR18362948,  
452 SRR18362952, SRR18362951, SRR18362947, SRR18362946, SRR18362945, SRR18362940,  
453 SRR18362958, SRR18362956, SRR18362955, SRR18362954, SRR18362949, SRR18362957,  
454 SRR18362953, SRR18362960, SRR18362959, SRR18362941).

455 RNA extraction and sequencing was done by GeneWiz (New Jersey, USA), using kidney  
456 and testis from three individuals. We received 177,016,012 151bp paired-end reads  
457 (SRR18362961, SRR18362937, SRR18362950, SRR18362943, SRR18362942,  
458 SRR18362938).

459

## 460 Genome assembly and annotation

461 We used the HiFiASM assembly software (Cheng et al. 2020) to build the first iteration  
462 genome using the PacBio HiFi reads with the flag -l 1 to lightly purge duplicates. This initial  
463 assembly was then scaffolded using the OmniC read-pairs and the HiRise pipeline. To the  
464 OmniC-scaffolded assembly we aligned the raw reads from the genetic map (Brekke et al.  
465 2019) using bwa (Li and Durbin 2009) and ran the Stacks2 (Rochette et al. 2019) pipeline  
466 followed by R/qtl (Broman et al. 2003; Arends et al. 2014) to build a genome-guided genetic  
467 map. This map informed additional merges of scaffolds which we did using the custom script  
468 assemble\_genome\_and\_recoordinate\_gff.py (Supplemental Material 4). At this point there was  
469 a single linkage group per chromosome (omitting the Y) and so the scaffold designation was  
470 dropped from the name of those fasta entries. Thus anything named, for instance, simply  
471 “Chr13” is tied to a linkage group whereas the scaffolds without genetic markers kept the longer  
472 names of the form “Chr13\_unplaced\_Scaffold\_28”. To further assemble the reference, we  
473 aligned the Oxford Nanopore ultra-long reads using minimap2 (v2.17) (Li 2018) which also  
474 suggested additional merges. We built a hybrid assembly using the Bionano optical mapping  
475 data but it did not suggest any further merges and was not used in any analysis.

476 Our annotation was done on the Omni-C scaffolded version of the genome using the  
477 RNAseq data from GeneWiz (New Jersey, USA). Repeat families found in the genome  
478 assemblies of *Meriones unguiculatus* were identified de novo and classified using the software  
479 package RepeatModeler (v2.0.1) (Flynn et al. 2020). RepeatModeler depends on the programs  
480 RECON (v1.08) (Bao and Eddy 2002) and RepeatScout (v1.0.6) (Price et al. 2005) for the *de*  
481 *novo* identification of repeats within the genome. The custom repeat library obtained from  
482 RepeatModeler were used to discover, identify, and mask the repeats in the assembly file using  
483 RepeatMasker (v4.1.0) (Tarailo-Graovac and Chen 2009). Coding sequences from *Meriones*

484 *unguiculatus*, *Psammomys obesus*, *Mus musculus*, *Rattus norvegicus* and *Peromyscus*  
485 *maniculatus* were used to train the initial *ab initio* model for *Meriones unguiculatus* using the  
486 AUGUSTUS software (v2.5.5) (Keller et al. 2011). Six rounds of prediction optimisation were  
487 done with the software package provided by AUGUSTUS. The same coding sequences were  
488 also used to train a separate *ab initio* model for *Meriones unguiculatus* using SNAP (v2006-07-  
489 28) (Korf 2004). RNAseq reads were mapped onto the genome using the STAR aligner software  
490 (v2.7) (Dobin et al. 2013) and intron hints generated with the bam2hints tools within the  
491 AUGUSTUS software. MAKER, SNAP and AUGUSTUS (with intron-exon boundary hints  
492 provided from RNA-Seq) were then used to predict for genes in the repeat-masked reference  
493 genome. To help guide the prediction process, Swiss-Prot peptide sequences from the UniProt  
494 database were downloaded and used in conjunction with the protein sequences from *Meriones*  
495 *unguiculatus*, *Psammomys obesus*, *Mus musculus*, *Rattus norvegicus* and *Peromyscus*  
496 *maniculatus* to generate peptide evidence in the Maker pipeline. Only genes that were predicted  
497 by both SNAP and AUGUSTUS softwares were retained in the final gene sets. To help assess  
498 the quality of the gene prediction, AED scores were generated for each of the predicted genes  
499 as part of the MAKER pipeline. Genes were further characterised for their putative function by  
500 performing a BLAST search of the peptide sequences against the UniProt database. tRNA were  
501 predicted using the software tRNAscan-SE (v2.05) (Chan and Lowe 2019). The gff annotation  
502 file was then re-coordinated along with each subsequent merging of scaffolds through the  
503 remaining assembly steps using the custom python script  
504 `assemble_genome_and_recoordinate_gff.py` (Supplemental Material 4).

505 The annotation pipeline described above did a perfunctory identification of repetitive  
506 elements as a step towards finding a high-quality set of genes, but to assemble and curate a  
507 high-quality list of repetitive sequences, we used the EarlGrey pipeline (Baril et al. 2022). This  
508 was configured with Dfam (version 3.4) (Hubley et al. 2016) and RepBase (release 20181026)

509 (Jurka et al. 2005; Kapitonov and Jurka 2008), specifying known repeats from *Rodentia* (-r  
510 rodentia).

## 511 Chromosome Assignment

512 Scaffolds from the final genome were assigned to chromosomes by the parallel  
513 approaches of sequencing each sorted chromosome pool and also using each pool as a FISH  
514 probe. Illumina reads from the pool sequencing were aligned to the assembly with bwa (Li and  
515 Durbin 2009). For the alignment of each chromosome pool, we counted the number of reads  
516 mapping to each scaffold and calculated the reads mapped per scaffold length. Each scaffold  
517 then has a read-mapping density from each pool making it possible to associate every scaffold  
518 with the pool to which it belonged. We calculated the 99.99% confidence interval of the read  
519 mapping density and the scaffold was assigned to the pool that fell outside the confidence  
520 interval. In 30 of the 194 cases, a scaffold assigned to either no pool or to multiple pools and we  
521 marked these as 'unknown'. Unknown scaffolds comprise 1,588,872 bases, 0.06% of the total  
522 genome.

523 The final link in the chain connecting the karyotype with the chromosomes was made  
524 using cross-species FISH. The chromosomes in the gerbil karyotype were named by Weiss  
525 (Weiss et al. 1970) who defined the pattern of G-bands on each chromosome. Spleen cells  
526 were cultured as per (Yang et al. 2017) in complete RPMI (i.e. RPMI with fetal calf serum,  
527 penicillin, and streptomycin) with added EPS to stimulate immune cell growth at 37C and 5%  
528 CO<sub>2</sub> for 48 hours after which colchicine was added to arrest the cells in metaphase. After an  
529 hour, the cells were spun down and resuspended in fixative and stored at -20C. Metaphase  
530 spreads were made by dropping 14 µl of cell suspension on a glass slide and drying at high  
531 humidity while floating in a 55C water bath. We created FISH probes from each chromosome  
532 pool and hybridized them to a chromosome spread, thereby linking the banding pattern of each

533 chromosome with a pool. FISH probes were made and hybridized to the metaphase spreads  
534 following (Murchison et al. 2012)

535 Male gerbils have 23 unique chromosomes (21 autosomes, an X, and a Y) and so we  
536 expected six of the 17 pools to have multiple chromosomes which is what we found. Eleven of  
537 the pools had a single chromosome while six included multiple chromosomes. For those pools  
538 with multiple chromosomes, we extracted the genes from the annotation file of the gerbil  
539 scaffolds and queried BioMart for the chromosome locations of those genes in mouse. From this  
540 it was clear which mouse chromosome corresponded with each gerbil scaffold thus allowing us  
541 to infer which gerbil banding pattern is associated with each sequence record in the gerbil  
542 genome. For further details, please see Supplemental Material 1.

543 Thus, the final version of gerbil genome presented here is the result of PacBio HiFi  
544 reads assembled with HiFiAsm (Cheng et al. 2020), scaffolded with OmniC paired reads,  
545 annotated with kidney and liver RNAseq data, further scaffolded with a high-density SNP-based  
546 genetic linkage map and then Oxford Nanopore ultra-long reads, and assigned to physical  
547 chromosomes using chromosome sorting and chromosomal FISH.

548

## 549 Genome Analysis

550 GC content and gene density were analyzed for every scaffold in the genome in sliding  
551 windows using the custom script Calc\_R\_GC\_Gene\_density.py (Supplemental Material 4). The  
552 window size for GC content is 1,000bp while the window size for gene density is 1Mb in both  
553 cases the windows progressed by 1kb across each scaffold. Recombination rate was estimated  
554 by taking a sliding window of 8 genetic markers and calculating the slope of the regression of  
555 their genetic position against their physical position. As the sliding window progressed by a  
556 single marker, each inter-marker region had eight rates associated with it and these were



557 averaged to get the recombination rate of each inter-marker region. The genome-wide  
558 recombination rate was calculated by taking the mean of the rate of each region weighted by the  
559 length of region. Recombination hotspots were identified by identifying every region whose rate  
560 was greater than 5 times the genome average and adjacent regions were merged. Entropy and  
561 Linguistic complexity were calculated using the program NeSSie (Berselli et al. 2018) using a  
562 sliding window with size 10k and a step of 1k as recommended.

563 We identified centromere location by visually identifying the trough in the linguistic  
564 complexity data of each chromosome. To understand the fine-scale structure of each  
565 centromere, we extracted the region and used the program NTRprism (Altemose et al. 2022) to  
566 identify the lengths of the different repeats and TandemRepeatFinder (Benson 1999) to identify  
567 the sequence of repeats of each length, the data from which forms the basis of the coloured  
568 centromere call-outs in Figure 2. TandemRepeatFinder also served to identify the location of  
569 telomere repeats along the length of the chromosome. We identified interstitial telomere sites as  
570 those with at least 70 tandem copies of the telomere repeat.

571 The locations of the 387 GC outlier genes in *Meriones* identified by (Pracana et al. 2020)  
572 were extracted from the annotation file. Due to some gene duplications this resulted in 410  
573 genomic locations in our assembly. We tested whether these locations were more clustered  
574 than chance by drawing 410 random genes from the genome 1,000,000 times and calculating  
575 the average that separated each from its closest neighbor in the set, and calculated a p-value  
576 by taking the proportion of the permutations that had a lower average distance than the  
577 observed set. We calculated how close they were to recombination in two ways, first by a t-test  
578 comparing the distribution of all genes' proximity to recombination hotspots with the distribution  
579 of the outlier genes and second by randomly drawing 410 genes 1,000,000 times and  
580 calculating the average distance to the nearest hotspot for the draw. A p-value was calculated  
581 for the permutation test as described above. A similar pair of tests was done to evaluate

582 whether the outlier genes were non-randomly placed along a chromosome arm and whether  
583 they were more closely located to telomere repeats (interstitial and normal) than expected by  
584 chance. For the location along a chromosome arm we transformed physical position of each  
585 gene in to a percentage going from the centromere at 0 to the telomere at 100 in order to  
586 compare chromosome arms of different sizes.

587         A self alignment was made for each scaffold that assigned to chromosome 13 as well as  
588 a few selected autosomes (10, 16, and 21) and the Y chromosome. The self-alignment was  
589 done with mummer4 (Kurtz et al. 2004) using the “maxmatch” and “nosimplify” parameters to  
590 identify repetitive elements. Mummer was also used to compare our genome with both the other  
591 chromosome-scale *Meriones* assembly (Cheng et al. 2019) and an unpublished chromosome-  
592 scale *Psammomys obesus* assembly provided by David Thybert using the “mum” parameter.

593

594 Meiotic chromosome preparation and immunofluorescence

595 We obtained preparations of male meiotic chromosomes as previously described (Peters et al.  
596 1997; de la Fuente et al. 2007) Briefly, a cell suspension was made in PBS from whole testicles  
597 by rubbing seminiferous tubules with the help of two forceps. Then, cells were transferred to a  
598 10mM sucrose solution and spread over glass slides previously covered with paraformaldehyde  
599 1% in distilled water (pH 9,5) containing 0.15% of Triton X-100. After two hours standing  
600 horizontally on a humid chamber, slides were washed in distilled water with 0.04% Photoflo, air  
601 dried and stored at -80°C until use. For immunofluorescence, slides were incubated overnight at  
602 4°C with the following primary antibodies diluted 1:100 in PBS: goat anti-SYCP3 protein of the  
603 synaptonemal complex (Santa Cruz 20845); rabbit anti histone H3 trimethylated at lysine 9  
604 (H3K9me3) (Abcam 8898), as a marker of heterochromatin; human anti-centromere (Antibodies  
605 Incorporated 15-234); and mouse anti-MLH1 (PharMingen 550838), as a marker of meiotic

606 crossovers. After washing three times in PBS slides were incubated for one hour at room  
607 temperature with secondary antibodies conjugated with Alexafluor 350, Alexafluor 488, Cy3 or  
608 Cy5, diluted 1:100 in PBS, all of them from Jackson ImmunoResearch Laboratories. After three  
609 washes in PBS slides were mounted with Vectashield. Observations were made in an Olympus  
610 BX61 microscope equipped with appropriate fluorescence filters and an Olympus DP72 digital  
611 camera. Then, images were treated with Adobe Photoshop (Adobe) and Image J.  
612 Bivalents 5 and 13 were identified in pachytene spermatocytes owing to the presence of an  
613 interstitial H3K9me3 region or by a complete labeling with this histone marks, respectively. To  
614 assess the position of MLH1 foci along the bivalents, we measured the length of the  
615 synaptonemal complex of these two bivalents using the free hand tool in ImageJ. The distance  
616 of centromeres and MLH1 foci from the tip of the short arm of the bivalents were recorded in the  
617 same way. Then the position of MLH1 foci was normalized against the length of the  
618 corresponding bivalent, yielding a position between 0 (the proximal end) and 1 (the distal end).  
619 The position of all foci was presented in cumulative frequency chart. A total of 83 spermatocytes  
620 from two different individuals were scored.

621

622 **List of Supplementary materials:**

623

624 Supplemental Material 1: The detailed methods of the chromosome sorting and the logic linking  
625 the fasta records to the karyotype.

626

627 Supplemental Material 2: Supplemental Tables and Figures including:

628 Table S1: Genetic map statistics.

629 Table S2: Comparison of published gerbil genomes.

630 Figure S1: Dovetail OmniC contact map.

631 Figure S2: GC content, gene density, entropy, and linguistic complexity in sliding  
632 windows across each chromosome.

633 Figure S3: Whole-genome alignment of the genome presented here and Cheng et al  
634 (2019)'s HiC scaffolded version.

635 Figure S4: Recombination rates for each chromosome showing hotspots.

636 Figure S5: Marey maps for each chromosome showing hotspots.

637 Figure S6: Repeat frequency spectra for the centromeric region of each chromosome.

638 Figure S7: A whole genome alignment of *Meriones unguiculatus* chromosome 5 with  
639 *Psammomys obesus* chromosome 10 showing the expansion of *Meriones unguiculatus* Chr5.

640

641 Supplemental Material 3: A very high-resolution image of Figure 2D to facilitate close inspection  
642 of chromosomal features.

643

644 Supplemental Material 4: Code base. All in-house scripts. See `do_it_all_genome_polish_v6.sh`  
645 for a step-by-step call sequence. Also includes some metadata files needed to run the pipeline  
646 and some Rdata packets to skip some time-consuming analyses.



648 **Acknowledgements**

649           The authors would like to thank Aaron Comeault, Martin Swain, Yichen Dai, Adam  
650 Hargreaves, Peter Holland, and Roddy Pracana for helpful discussions pertaining to the project,  
651 and Becca Snell for help with animal care. TDB would like to thank Kris Crandell. This work was  
652 supported by the Leverhulme Trust grant entitled "Decoding Dark DNA" (grant number RPG-  
653 2018-433) and by the National Environmental Research Council of the UK (grant number  
654 NE/R001081/1 to A.S.T.P) and by grant CGL2014-53106-P from Ministerio de Economía y  
655 Competitividad (Spain to J.P.). Unpublished genome assemblies for *Meriones unguiculatus* are  
656 used with permission from the DNA Zoo Consortium ([dnazoo.org](http://dnazoo.org)).

657

658 **Authors contributions**

659 O.F. and E.J.– chromosome sorting, editing manuscript

660 F.Y. and B.F. – FISH, editing manuscript

661 T.B. and A.H. – EarlGrey, repeat annotations, editing manuscript

662 J.P and R. d. I. F. – recombination/histone analyses, editing manuscript

663 T.D.B., J. F. M., and A. S. T. P. – conceived study, genome sequencing, assembly, analysis,

664 overall coordination, writing and editing manuscript

665

666

667 **Competing interests**

668 The authors declare no competing interests.

669

670 **Data and materials availability**

671 All sequencing data and the genome is available under SRA BioProject PRJNA397533.

672 PacBio HiFi: SRR18362962.

673 Illumina OmniC: SRR18362944.

674 Oxford Nanopore PromethION: SRR18362939.

675 Illumina MiSeq sorted chromosome sequencing: SRR18362948, SRR18362952,  
676 SRR18362951, SRR18362947, SRR18362946, SRR18362945, SRR18362940, SRR18362958,  
677 SRR18362956, SRR18362955, SRR18362954, SRR18362949, SRR18362957, SRR18362953,  
678 SRR18362960, SRR18362959, SRR18362941.

679 Illumina RNAseq from testis and kidney: SRR18362961, SRR18362937, SRR18362950,  
680 SRR18362943, SRR18362942, SRR18362938.

681 This Whole Genome Shotgun project has been deposited at DDBJ/ENA/GenBank  
682 under the accession JAODIK000000000. The version described  
683 in this paper is version JAODIK010000000.

684 The genetic map, a vcf of the genetic markers and their genotypes in the mapping panel,  
685 the gff of the gene annotations, and the gff of the repetitive element annotations can be found in  
686 the Dryad repository here: Brekke, Thomas D (2022), Data for "The origin of a new  
687 chromosome in gerbils", Dryad, Dataset, <https://doi.org/10.5061/dryad.1vhmgqws>. Reviewers  
688 may find these data files ahead of publication here:  
689 <https://datadryad.org/stash/share/R5vtycW8DE6euNZJEe26JvJIVTmCEaJV09SQpfXWAJk>

690

691 **Tables and Figures**

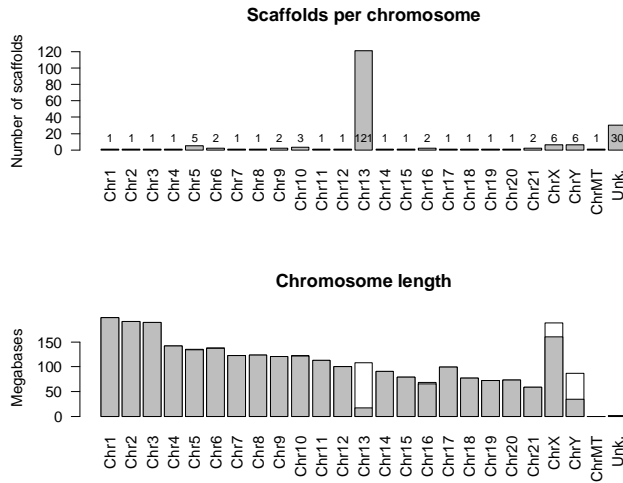

692

693 **Figure 1: Summary statistics for the Mongolian gerbil (*Meriones unguiculatus*) genome**  
694 **assembly. Top: The number of scaffolds assigned to each chromosome, the mitochondrial**  
695 **genome, and the 'unknown' category. Most chromosomes are assembled into 1 or 2 scaffolds,**  
696 **while chromosome 13 is in 121 pieces. Bottom: The number of bases assigned to each**  
697 **chromosome with the single longest scaffold shaded in grey. The total amount of DNA**  
698 **sequence assigned to chromosome 13 is about what would be expected, showing that we are**  
699 **not missing data, and that the large number of scaffolds is not an artefact.**

700



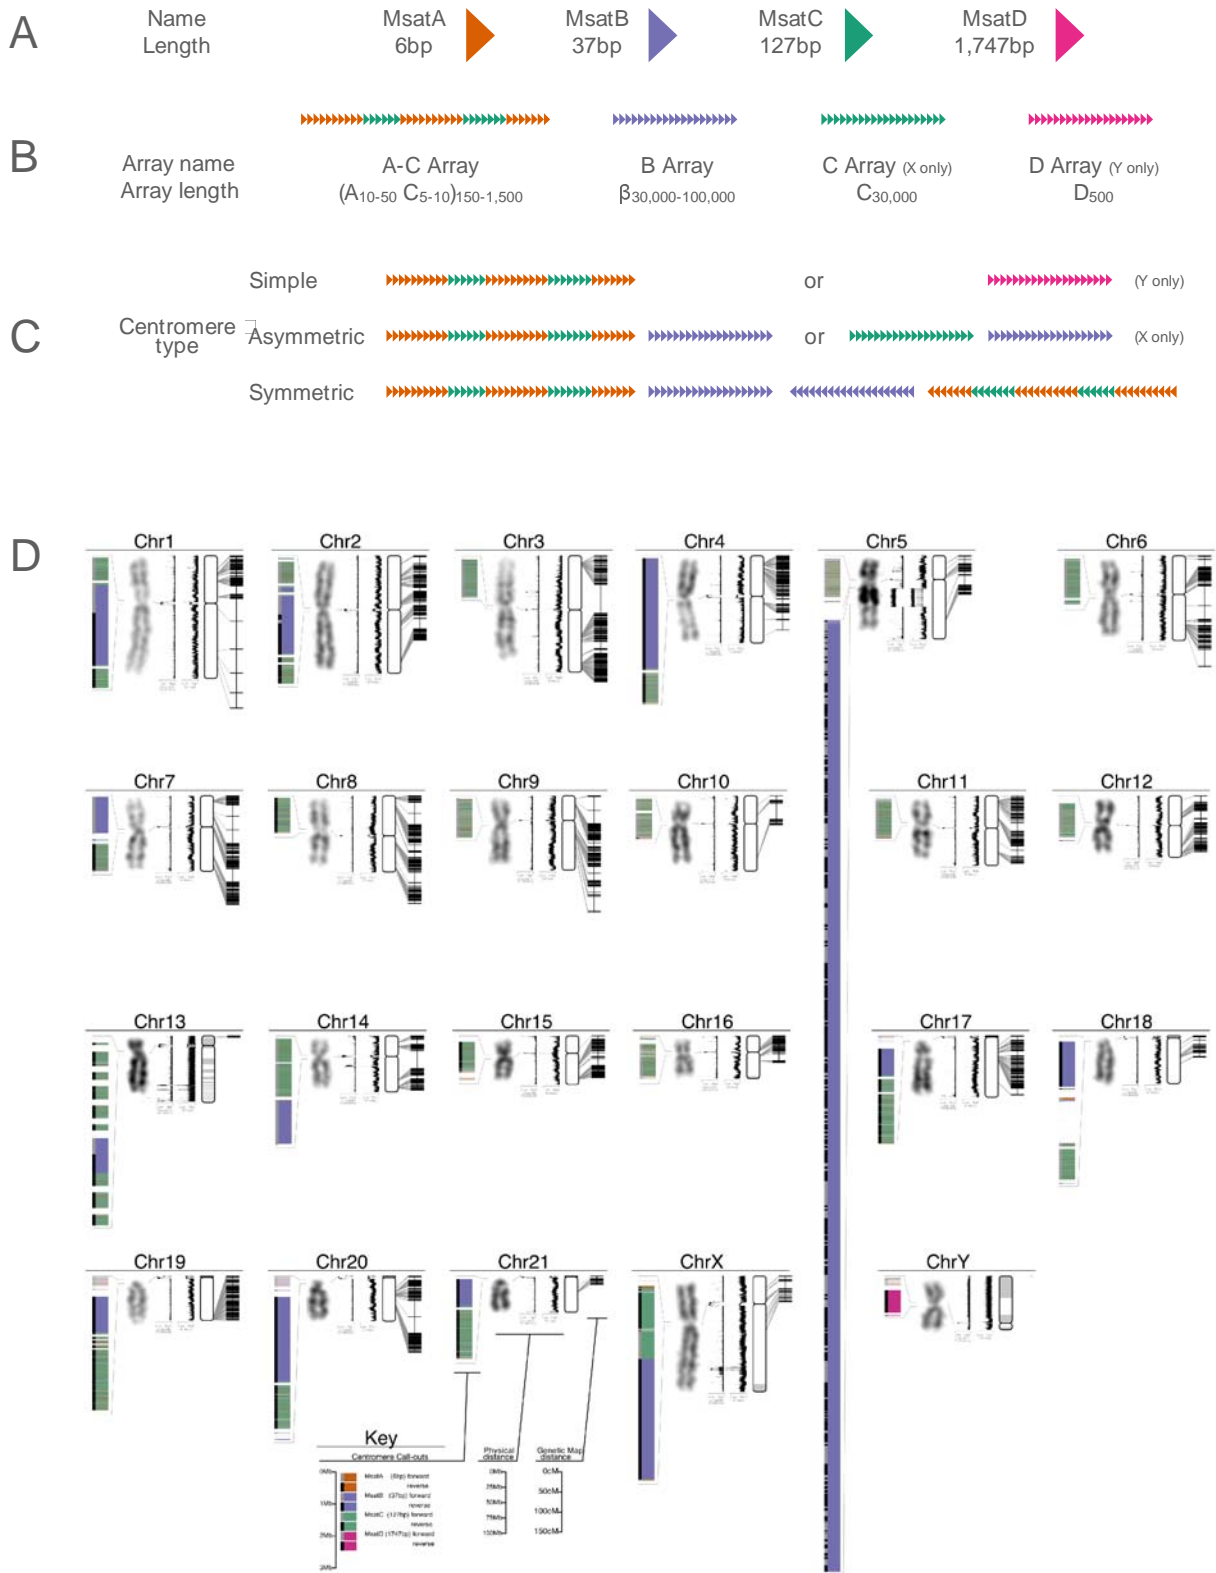

701  
702 Figure 2: The Mongolian gerbil (*Meriones unguiculatus*) genome. Gerbil centromere types. (A)

703 There are four different repeat types in gerbil centromeres: MsatA (6bp), MsatB (37bp), MsatC

704 (127bp), and MsatD (1,747 bp). (B) These repeats appear in one of four repeat arrays. The A-C  
705 array consists of 10-50 copies of MsatA alternating with 5-10 copies of MsatC, all of which is  
706 repeated 150-1,500 times. The B-, C-, and D- arrays contain only multiple copies of their  
707 respective repeat. Repeat units within an array most often occur in the same orientation. In  
708 some chromosomes however both orientations occur within a single array, in which case  
709 hundreds of repeat units in the forward orientation are followed by hundreds of units in the  
710 reverse orientation (e.g. the B array of Chromosome 2 in Figure 2). (C) Centromeres consist of  
711 between one and three repeat arrays and are classed as either 'simple', 'asymmetric', or  
712 'symmetric'. Simple centromeres have a single array type, either an A-C array as in the  
713 autosomes, or a D array as on the Y Chromosome. Asymmetric centromeres have two arrays:  
714 either an A-C array and a B array (for the autosomes) or a C array and a B array (for the X  
715 chromosome). Symmetric centromeres consist of three arrays, a B array sandwiched between  
716 two A-C arrays which typically appear in opposite orientation to each other. (D) Genome  
717 schematic, for each chromosome we show, from left to right: (1) centromere organization, with  
718 repeats of different lengths in different colors and the orientation of the repeat array denoted by  
719 a grey or black bar on the left. Chromosome 5 has a large expansion of centromeric repeats in  
720 the long arm. All call-outs are drawn to the same scale. (2) The DAPI-banding karyotype image,  
721 showing the intra-arm heterochromatin on chromosome 5, and the entirely dark staining on  
722 chromosome 13. (3) Linguistic complexity and (4) entropy, both measured in overlapping sliding  
723 10kb windows with a step size of 1kb. For both metrics, a low value indicates highly repetitive or  
724 predictable sequence as are characteristic of centromeres while high values indicate more  
725 complex sequence as may be found in gene-rich regions. (5) A depiction of the physical map  
726 with scaffolds shaded alternately white and grey, and (6) a depiction of the genetic map with  
727 links between the genetic markers and their physical location. Thin grey lines link the location of  
728 similar features on adjacent plots (i.e. centromere callout to karyotype; centromere location in

729 the karyotype to centromere in the linguistic complexity plot; genetic markers to their physical

730 location). A high-resolution copy of panel D can be found in the supplement (Figure SC)

731

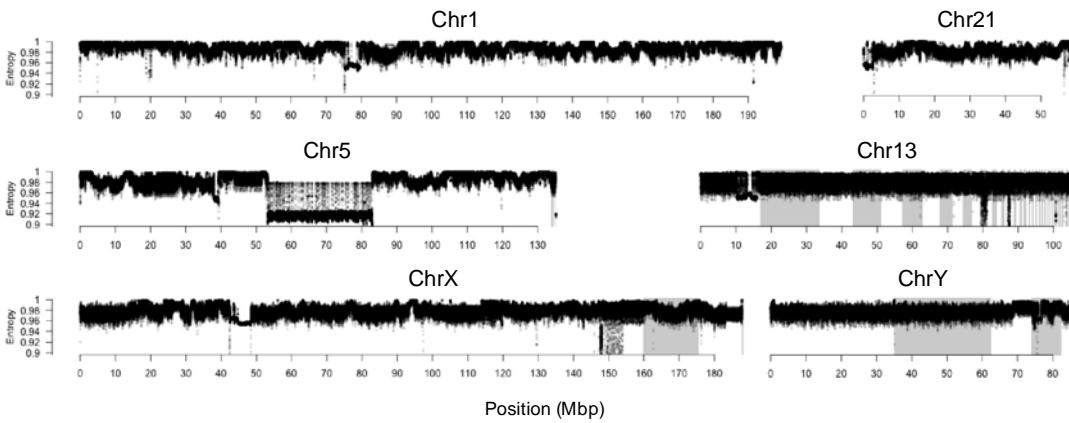

732

733 Figure 3: Entropy plots for a selection of chromosomes including the “normal” autosomes 1 and  
734 21, the unusual autosomes 5 and 13, and both sex chromosomes. The unordered scaffolds  
735 within a chromosome are shaded alternately white and grey. Note the spatial heterogeneity in  
736 chromosomes 1 and 21 that is absent in chromosome 13 and the Y. Indeed, chromosome 13 is  
737 the most homogenous chromosome in the gerbil. Plots for every chromosome, as well as GC  
738 content, gene density, and linguistic complexity can be found in Figure SC.

739

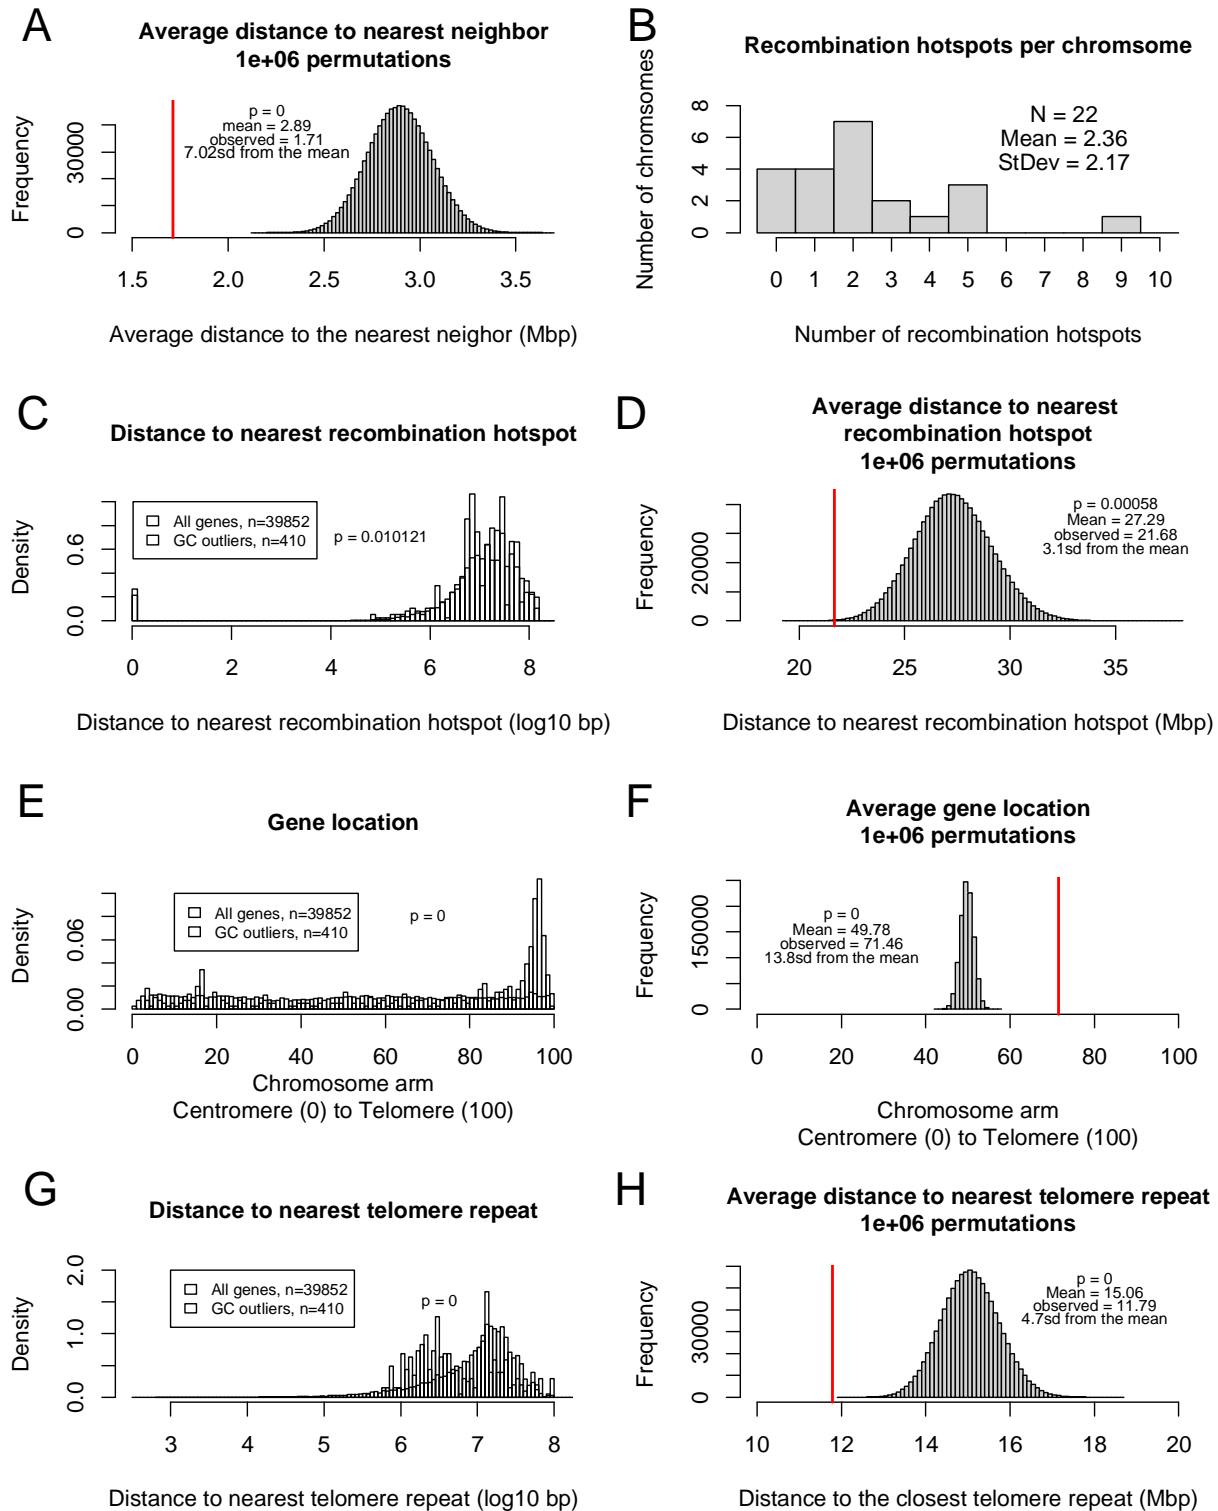

740

741 Figure 4: GC-rich genes are nonrandomly distributed in the *M. unguiculatus* genome. We

742 compared the location of the 410 GC rich genes (Pracana et al. 2020) in relation to each other,

743 the nearest recombination hotspot, their location along the chromosome arm, and their proximity  
744 to telomere repeats both interstitial and at the ends of chromosome arms. These comparisons  
745 were done once against the entire gene set (C, E, G) and again using a permutation test with  
746 1,000,000 draws of a random set of 410 genes (A, D, F, H). (A) GC rich genes are clustered in  
747 the genome. The observed distance between each outlier gene and its nearest outlier gene  
748 neighbor is significantly shorter than those distances between a random group of genes  
749 (permutation test,  $n=1,000,000$  permutations,  $p=0$ ). (B) We identified 52 recombination hotspots  
750 spread across 18 of the 22 chromosomes (average = 2.36 hotspots per chromosome). (C, D)  
751 GC-rich genes occur closer to recombination hotspots than expected by chance (C: t-test,  $df =$   
752  $383.2$ ,  $t = 2.585$ ,  $p = 0.01012$ ; D: permutation test,  $n = 1,000,000$ ,  $p = 0$ ). (E, F) GC rich genes  
753 are found closer to the telomere end of chromosome arms than expected by chance (E: t-test,  
754  $df = 418$ ,  $t = -14.26$ ,  $p = 0$ ; F: permutation test,  $n=1,000,000$ ,  $p=0$ ). (G, H). GC-rich genes are  
755 clustered nearer telomere repeats (interstitial or otherwise) than expected by chance (G: t-test,  
756  $df = 418.6$ ,  $t = 7.876$ ,  $p=0$ ; H: permutation test,  $n=1,000,000$ ,  $p=0$ ).

757

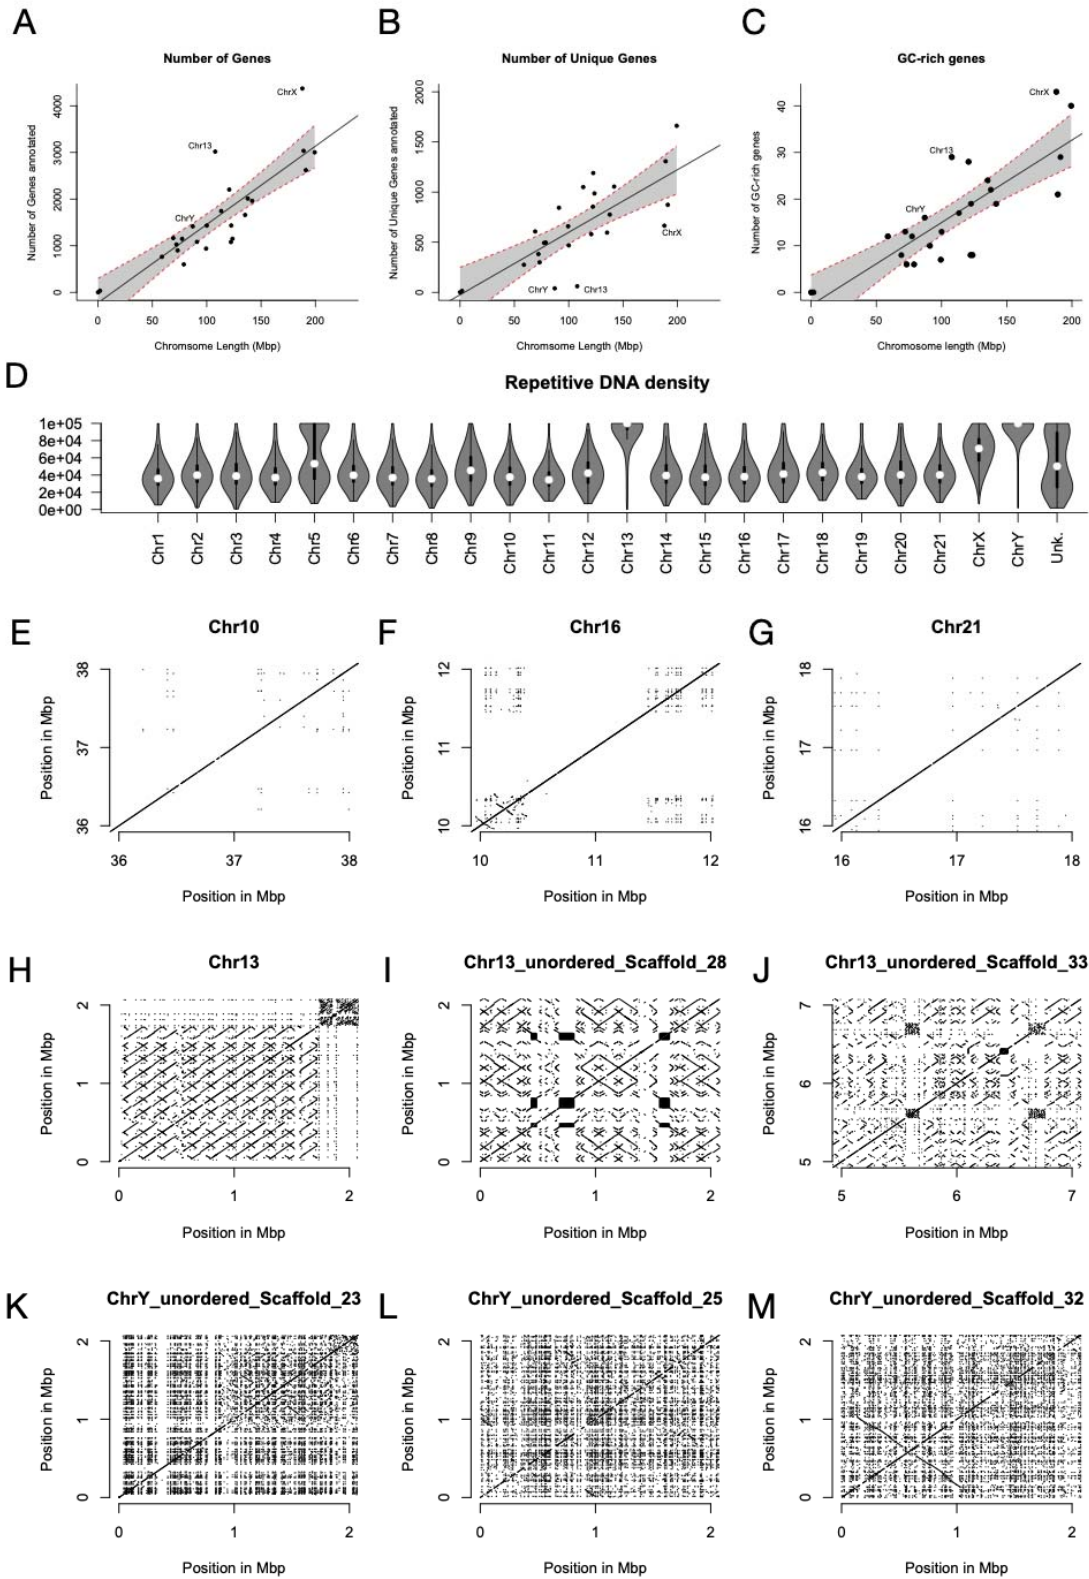

759

760 Figure 5. Chromosome 13 is unusual in terms of gene content and repetitive DNA density. (A)  
761 There is a strong relationship between chromosome length and gene number, but both  
762 chromosome 13 and the X have more genes than expected for their length. (B) When duplicate  
763 genes are removed, chromosome 13 and both sex chromosomes have far fewer genes than  
764 expected based on their length (error bars show the 95% confidence interval). (C) Chromosome  
765 13 is enriched for GC-rich genes. (D) Chromosome 13 has far higher repetitive DNA content  
766 than the other autosomes and is rivaled only by the Y. Panels E-M show a self-alignment of a  
767 selection of “typical” chromosomes (E: Chr10; F: Chr16; G: Chr21), as well as three of the  
768 longer scaffolds from the highly repetitive chromosome 13 (H, I, J) and the Y (K, L, M). Each  
769 panel shows a 2Mbp section of chromosome and only alignments longer than 1,000 bases are  
770 plotted. The primary alignments are clearly visible as diagonal lines at  $y=x$ . All alignments off of  
771 the 1:1 line are repetitive sequence. The prevalence of repetitive sequence on chromosome 13  
772 is much higher than other autosomes, and is most similar to the situation on the Y chromosome  
773 (D). However, repeats on chromosome 13 (H, I, J) are much longer than those on the Y (K, L,  
774 M), as expected based on their fundamentally different evolutionary history.

775

776

777

778

779

780



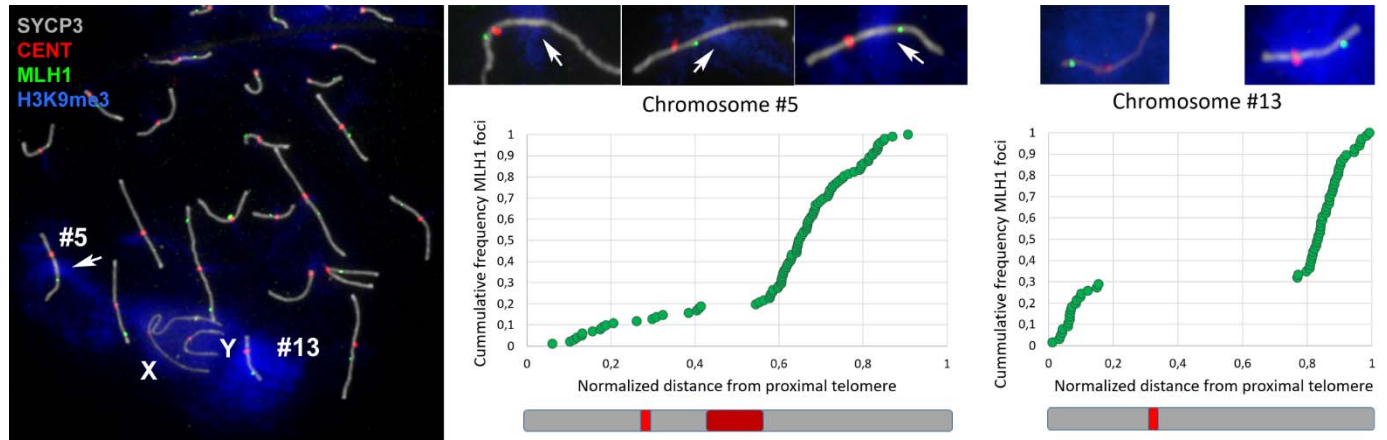

781

782 Figure 6 Figure 6. Distribution of recombination events in gerbil spermatocytes. (A)

783 Immunolocalization of SYCP3 protein (grey) on meiotic chromosomes marks the trajectory of  
784 the synaptonemal complex along bivalents; trimethylation of histone H3 at lysine 9 (H3K9me3,

785 blue) marks heterochromatin; CENT (red) stains centromeres; and MLH1 (green) marks the

786 sites of crossovers. H3K9me3 is associated with the entirety of chromosome 13 (#13), a large

787 intra-arm region of chromosome 5 (#5), and, to a lesser extent, the X and Y. The anti-CENT

788 antibody (red) stains centromeres on all chromosomes but is not specifically associated with the

789 large centromeric expansion of the long arm of chromosome 5. MLH1 foci can be located

790 proximally, interstitially, or distally along bivalent 5 (central details, selected from three different

791 spermatocytes), but they are never found within the centromere repeat expansion on this

792 chromosome. Chromosome 13 shows either proximal or distal location of MLH1 foci (details on

793 the right). (B) and (C) Graphs of MLH1 frequency against distance from the nearest telomere for

794 bivalents 5 and 13, respectively. Each dot represents the location of the MLH1 focus along the

795 synaptonemal complex on a single spermatocyte. The locations of centromeres and the

796 chromosome 5 expansion are indicated as red and purple boxes, respectively, on the schematic

797 chromosomes above each graph. The graphs and drawings preserve the relative size of both

798 chromosomes. For chromosome 5, most crossovers (over 80%) are located from the

799 heterochromatic expansion towards the distal end. For chromosome 13, MLH1 foci are

800 conspicuously accumulated towards the chromosomal ends, with an approximate 70:30

801 distribution on the long and short arms respectively.

802

803

804

805

806

807

808 **References**

809  
810

- 811 Accili, D., J. Drago, E. J. Lee, M. D. Johnson, M. H. Cool, P. Salvatore, L. D. Asico, P. A. José, S. I.  
812 Taylor, and H. Westphal. 1996. Early neonatal death in mice homozygous for a null allele of the  
813 insulin receptor gene. *12*:106–109.
- 814 Ahmad, S., and C. Martins. 2019. The Modern View of B Chromosomes Under the Impact of High Scale  
815 Omics Analyses. *Cells* 8:156–26.
- 816 Altomose, N., G. A. Logsdon, A. V. Bzikadze, P. Sidhwani, S. A. Langley, G. V. Caldas, S. J. Hoyt, L.  
817 Uralsky, F. D. Ryabov, C. J. Shew, M. E. G. Sauria, M. Borchers, A. Gershman, A. Mikheenko, V. A.  
818 Shepelev, T. Dvorkina, O. Kunyavskaya, M. R. Vollger, A. Rhie, A. M. McCartney, M. Asri, R.  
819 Lorig-Roach, K. Shafin, J. K. Lucas, S. Aganezov, D. Olson, L. G. de Lima, T. Potapova, G. A.  
820 Hartley, M. Haukness, P. Kerpedjiev, F. Gusev, K. Tigyi, S. Brooks, A. Young, S. Nurk, S. Koren, S.  
821 R. Salama, B. Paten, E. I. Rogaev, A. Streets, G. H. Karpen, A. F. Dernburg, B. A. Sullivan, A. F.  
822 Straight, T. J. Wheeler, J. L. Gerton, E. E. Eichler, A. M. Phillippy, W. Timp, M. Y. Dennis, R. J.  
823 O’Neill, J. M. Zook, M. C. Schatz, P. A. Pevzner, M. Diekhans, C. H. Langley, I. A. Alexandrov, and  
824 K. H. Miga. 2022. Complete genomic and epigenetic maps of human centromeres. *Science*  
825 376:eabl4178.
- 826 Aniskin, V. M., T. Benazzou, L. Biltueva, G. Dobigny, L. Granjon, and V. Volobouev. 2006. Unusually  
827 extensive karyotype reorganization in four congeneric *Gerbillus* species (Muridae: Gerbillinae).  
828 *Cytogenet Genome Res* 112:131–140.
- 829 Arbeithuber, B., A. J. Betancourt, T. Ebner, and I. Tiemann-Boege. 2015. Crossovers are associated with  
830 mutation and biased gene conversion at recombination hotspots. *Proc. Natl. Acad. Sci. U.S.A.*  
831 112:2109–2114.
- 832 Arends, D., P. Prins, R. C. Jansen, and K. W. Broman. 2014. R/qlt: high-throughput multiple QTL  
833 mapping. *Bioinformatics* 26:2990–2992.
- 834 Bao, Z., and S. R. Eddy. 2002. Automated De Novo Identification of Repeat Sequence Families in  
835 Sequenced Genomes. *Genome Res* 12:1269–1276.
- 836 Baril, T., R. M. Imrie, and A. Hayward. 2022. Earl Grey: a fully automated user-friendly transposable  
837 element annotation and analysis pipeline. *Biorxiv* 2022.06.30.498289.
- 838 Benazzou, T., E. Viegas-Pequignot, F. Petter, and B. Dutrillaux. 1982. Chromosomal phylogeny of four  
839 *Meriones* (Rodentia, Gerbillidae) species. *Ann. Genet.* 25:19–24.
- 840 Benazzou, T., E. Viegas-Pequignot, M. Prod’Homme, M. Lombard, F. Petter, and B. Dutrillaux. 1984.  
841 [Chromosomal phylogeny of Gerbillidae. III. Species study of the genera *Tatera*, *Taterillus*,  
842 *Psammomys* and *Pachyuromys*]. *Ann. Genet.* 27:17–26.
- 843 Benson, G. 1999. Tandem repeats finder: a program to analyze DNA sequences. *Nucleic Acids Res*  
844 27:573–580.

- 845 Berselli, M., E. Lavezzo, and S. Toppo. 2018. NeSSie: a tool for the identification of approximate DNA  
846 sequence symmetries. *Bioinformatics* 34:2503–2505.
- 847 Bignell, G. R., T. Santarius, J. C. M. Pole, A. P. Butler, J. Perry, E. Pleasance, C. Greenman, A. Menzies,  
848 S. Taylor, S. Edkins, P. Campbell, M. Quail, B. Plumb, L. Matthews, K. McLay, P. A. W. Edwards, J.  
849 Rogers, R. Wooster, P. A. Futreal, and M. R. Stratton. 2007. Architectures of somatic genomic  
850 rearrangement in human cancer amplicons at sequence-level resolution. *Genome Res* 17:1296–1303.
- 851 Bornelöv, S., E. Seroussi, S. Yosefi, K. Pendavis, S. C. Burgess, M. Grabherr, M. Friedman-Einat, and L.  
852 Andersson. 2017. Correspondence on Lovell et al.: identification of chicken genes previously assumed  
853 to be evolutionarily lost. *Genome Biol* 18:1–4.
- 854 Botero-Castro, F., E. Figuet, M.-K. Tilak, B. Nabholz, and N. Galtier. 2017. Avian Genomes Revisited:  
855 Hidden Genes Uncovered and the Rates versus Traits Paradox in Birds. *MBE* 34:3123–3131.
- 856 Brekke, T. D., K. A. Steele, and J. F. Mulley. 2018. Inbred or Outbred? Genetic diversity in laboratory  
857 rodent colonies. *G3* 8:679–686.
- 858 Brekke, T. D., S. Supriya, M. G. Denver, A. Thom, K. A. Steele, and J. F. Mulley. 2019. A high-density  
859 genetic map and molecular sex-typing assay for gerbils. *Mamm Genome* 30:63–70.
- 860 Broman, K. W., H. Wu, S. Sen, and G. A. Churchill. 2003. R/qtl: QTL mapping in experimental crosses.  
861 *Bioinformatics* 19:889–890.
- 862 Calogero, S., F. Grassi, A. Aguzzi, T. Voigtländer, P. Ferrier, S. Ferrari, and M. E. Bianchi. 1999. The  
863 lack of chromosomal protein Hmg1 does not disrupt cell growth but causes lethal hypoglycaemia in  
864 newborn mice. *Nat Genet* 22:276–280.
- 865 Camacho, J. P., T. F. Sharbel, and L. W. Beukeboom. 2000. B-chromosome evolution. *Philosophical*  
866 *Transactions of the Royal Society B: Biological Sciences* 355:163–178.
- 867 Campbell, P. J., S. Yachida, L. J. Mudie, P. J. Stephens, E. D. Pleasance, L. A. Stebbings, L. A.  
868 Morsberger, C. Latimer, S. McLaren, M.-L. Lin, D. J. McBride, I. Varela, S. A. Nik-Zainal, C. Leroy,  
869 M. Jia, A. Menzies, A. P. Butler, J. W. Teague, C. A. Griffin, J. Burton, H. Swerdlow, M. A. Quail,  
870 M. R. Stratton, C. Iacobuzio-Donahue, and P. A. Futreal. 2010. The patterns and dynamics of genomic  
871 instability in metastatic pancreatic cancer. *Nature* 467:1109–1113.
- 872 Chan, P. P., and T. M. Lowe. 2019. Gene Prediction, Methods and Protocols. *Methods Mol Biology*  
873 1962:1–14.
- 874 Chawengsaksophak, K., R. James, V. E. Hammond, F. Köntgen, and F. Beck. 1997. Homeosis and  
875 intestinal tumours in Cdx2 mutant mice. 386:84–87.
- 876 Cheng, H., G. T. Concepcion, X. Feng, H. Zhang, and H. Li. 2020. Haplotype-resolved de novo assembly  
877 with phased assembly graphs.
- 878 Cheng, S., Y. Fu, Y. Zhang, W. Xian, H. Wang, B. Grothe, X. Liu, X. Xu, A. Klug, and E. A. McCullagh.  
879 2019. De novo assembly of the Mongolian gerbil genome and transcriptome. *Biorxiv* 522516.

- 880 Craig-Holmes, A. P., and M. W. Shaw. 1971. Polymorphism of Human Constitutive Heterochromatin.  
881 Science 174:702–704.
- 882 Dai, Y., R. Pracana, and P. W. H. Holland. 2020. Divergent genes in gerbils: prevalence, relation to GC-  
883 biased substitution, and phenotypic relevance. BMC Evolutionary Biology 1–15.
- 884 Dhar, M. K., B. Friebe, A. K. Koul, and B. S. Gill. 2002. Origin of an apparent B chromosome by  
885 mutation, chromosome fragmentation and specific DNA sequence amplification. Chromosoma  
886 111:332–340.
- 887 Dillon, N. 2004. Heterochromatin structure and function. Biol Cell 96:631–637.
- 888 Dimitri, P., N. Corradini, F. Rossi, and F. Vernì. 2005. The paradox of functional heterochromatin.  
889 Bioessays 27:29–41.
- 890 Dobigny, G., V. Aniskin, and V. Volobouev. 2002. Explosive chromosome evolution and speciation in  
891 the gerbil genus *Taterillus* (Rodentia, Gerbillinae): a case of two new cryptic species. Cytogenet  
892 Genome Res 96:117–124.
- 893 Dobin, A., C. A. Davis, F. Schlesinger, J. Drenkow, C. Zaleski, S. Jha, P. Batut, M. Chaisson, and T. R.  
894 Gingeras. 2013. STAR: ultrafast universal RNA-seq aligner. Bioinformatics 29:15–21.
- 895 Evers, B., and J. Jonkers. 2006. Mouse models of BRCA1 and BRCA2 deficiency: past lessons, current  
896 understanding and future prospects. 25:5885–5897.
- 897 Eyre-Walker, A., and L. D. Hurst. 2001. The evolution of isochores. Nat Rev Genet 2:549–555.
- 898 Flynn, J. M., R. Hubley, C. Goubert, J. Rosen, A. G. Clark, C. Feschotte, and A. F. Smit. 2020.  
899 RepeatModeler2 for automated genomic discovery of transposable element families. Proc National  
900 Acad Sci 117:9451–9457.
- 901 Fong, G.-H., J. Rossant, M. Gertsenstein, and M. L. Breitman. 1995. Role of the Flt-1 receptor tyrosine  
902 kinase in regulating the assembly of vascular endothelium. 376:66–70.
- 903 de la Fuente, R. de la, M. Manterola, A. Viera, M. T. Parra, M. Alsheimer, J. S. Rufas, and J. Page. 2014.  
904 Chromatin Organization and Remodeling of Interstitial Telomeric Sites During Meiosis in the  
905 Mongolian Gerbil (*Meriones unguiculatus*). Genetics 197:1137–1151.
- 906 de la Fuente, R. de la, M. T. Parra, A. Viera, A. Calvente, R. Gómez, J. Á. Suja, J. S. Rufas, and J. Page.  
907 2007. Meiotic Pairing and Segregation of Achiasmata Sex Chromosomes in Eutherian Mammals: The  
908 Role of SYCP3 Protein. PLoS Genet 3:e198-12.
- 909 Galtier, N., G. Piganeau, D. Mouchiroud, and L. Duret. 2001. GC-content evolution in mammalian  
910 genomes: the biased gene conversion hypothesis. Genetics 159:907–911.
- 911 Gamperl, R., and G. Vistorin. 1980. Comparative study of G- and C-banded chromosomes of *Gerbillus*  
912 *campestris* and *Meriones unguiculatus* (Rodentia, Gerbillinae). Genetica 52–53:93–97.

- 913 Garsed, D. W., A. J. Holloway, and D. M. Thomas. 2009. Cancer-associated neochromosomes: a novel  
914 mechanism of oncogenesis. *Bioessays* 31:1191–1200.
- 915 Garsed, D. W., O. J. Marshall, V. D. A. Corbin, A. Hsu, L. Di Stefano, J. Schröder, J. Li, Z.-P. Feng, B.  
916 W. Kim, M. Kowarsky, B. Lansdell, R. Brookwell, O. Myklebost, L. Meza-Zepeda, A. J. Holloway,  
917 F. Pedoutour, K. H. A. Choo, M. A. Damore, A. J. Deans, A. T. Papenfuss, and D. M. Thomas. 2014.  
918 The Architecture and Evolution of Cancer Neochromosomes. *Cancer Cell* 26:653–667.
- 919 Gauthier, P., K. Hima, and G. Dobigny. 2010. Robertsonian fusions, pericentromeric repeat organization  
920 and evolution: a case study within a highly polymorphic rodent species, *Gerbillus nigeriae*.  
921 *Chromosome Res* 18:473–486.
- 922 Greenman, C., S. Cooke, J. Marshall, M. Stratton, and P. Campbell. 2012. Modelling Breakage-Fusion-  
923 Bridge Cycles as a Stochastic Paper Folding Process. *Arxiv*.
- 924 Grewal, S. I. S., and D. Moazed. 2003. Heterochromatin and Epigenetic Control of Gene Expression.  
925 *Science* 301:798–802.
- 926 Gustavsen, C. R., P. Chevret, B. Krasnov, G. Mowlavi, O. D. Madsen, and R. S. Heller. 2008. The  
927 morphology of islets of Langerhans is only mildly affected by the lack of Pdx-1 in the pancreas of  
928 adult *Meriones* jirds. *Gen Comp Endocr* 159:241–249.
- 929 Hargreaves, A. D., L. Zhou, J. Christensen, F. M. taz, S. Liu, F. Li, P. G. Jansen, E. Spiga, M. T. Hansen,  
930 S. V. H. Pedersen, S. Biswas, K. Serikawa, B. A. Fox, W. R. Taylor, J. F. Mulley, G. Zhang, R. S.  
931 Heller, and P. W. H. Holland. 2017. Genome sequence of a diabetes-prone rodent reveals a mutation  
932 hotspot around the ParaHox gene cluster. *PNAS* 12:201702930–6.
- 933 Hron, T., P. Pajer, J. Pačes, P. Bartůněk, and D. Elleder. 2015. Hidden genes in birds. *Genome Biol*  
934 16:164.
- 935 Hubley, R., R. D. Finn, J. Clements, S. R. Eddy, T. A. Jones, W. Bao, A. F. A. Smit, and T. J. Wheeler.  
936 2016. The Dfam database of repetitive DNA families. *Nucleic Acids Res* 44:D81–D89.
- 937 Jonsson, J., L. Carlsson, T. Edlund, and H. Edlund. 1994. Insulin-promoter-factor 1 is required for  
938 pancreas development in mice. *Nature* 371:606–609.
- 939 Jurka, J., V. V. Kapitonov, A. Pavlicek, P. Klonowski, O. Kohany, and J. Walichiewicz. 2005. Repbase  
940 Update, a database of eukaryotic repetitive elements. 110:462–467.
- 941 Kapitonov, V. V., and J. Jurka. 2008. A universal classification of eukaryotic transposable elements  
942 implemented in Repbase. *Nat Rev Genet* 9:411–412.
- 943 Katzer, F., R. Lizundia, D. Ngugi, D. Blake, and D. McKeever. 2011. Construction of a genetic map for  
944 *Theileria parva*: Identification of hotspots of recombination. *Int J Parasitol* 41:669–675.
- 945 Keller, O., M. Kollmar, M. Stanke, and S. Waack. 2011. A novel hybrid gene prediction method  
946 employing protein multiple sequence alignments. *Bioinformatics* 27:757–763.

- 947 Kikuta, H., M. Laplante, P. Navratilova, A. Z. Komisarczuk, P. G. Engstrom, D. Fredman, A. Akalin, M.  
948 Caccamo, I. Sealy, K. Howe, J. Ghislain, G. Pezeron, P. Mourrain, S. Ellingsen, A. C. Oates, C.  
949 Thisse, B. Thisse, I. Foucher, B. Adolf, A. Geling, B. Lenhard, and T. S. Becker. 2007. Genomic  
950 regulatory blocks encompass multiple neighboring genes and maintain conserved synteny in  
951 vertebrates. *Genome Res.* 17:545–555.
- 952 Knight, L. I., B. L. Ng, W. Cheng, B. Fu, F. Yang, and R. V. Rambau. 2013. Tracking chromosome  
953 evolution in southern African gerbils using flow-sorted chromosome paints. *Cytogenet Genome Res*  
954 139:267–275.
- 955 Korf, I. 2004. Gene finding in novel genomes. *Bmc Bioinformatics* 5:59–59.
- 956 Kuderna, L. F. K., E. Lizano, E. Julià, J. Gomez-Garrido, A. Serres-Armero, M. Kuhlilm, R. A.  
957 Alandes, M. Alvarez-Estape, D. Juan, H. Simon, T. Alioto, M. Gut, I. Gut, M. H. Schierup, O. Fornas,  
958 and T. Marques-Bonet. 2019. Selective single molecule sequencing and assembly of a human Y  
959 chromosome of African origin. *Nat Comm* 10:1–8.
- 960 Kurtz, S., A. Phillippy, A. L. Delcher, M. Smoot, M. Shumway, C. Antonescu, and S. L. Salzberg. 2004.  
961 Versatile and open software for comparing large genomes. *Genome Biol* 5:R12-9.
- 962 Lamb, B. C. 1984. The properties of meiotic gene conversion important in its effects on evolution.  
963 *Heredity* 53:113–138.
- 964 Leibowitz, G., S. Ferber, A. Apelqvist, H. Edlund, D. J. Gross, E. Cerasi, D. Melloul, and N. Kaiser.  
965 2001. IPF1/PDX1 Deficiency and  $\beta$ -Cell Dysfunction in *Psammomys obesus*, an Animal With Type 2  
966 Diabetes. *Diabetes* 50:1799–1806.
- 967 Lercher, M. J., N. G. C. Smith, A. Eyre-Walker, and L. D. Hurst. 2002. The Evolution of Isochores:  
968 Evidence From SNP Frequency Distributions. *Genetics* 162:1805–1810.
- 969 Li, H. 2018. Minimap2: pairwise alignment for nucleotide sequences. *Bioinformatics* 34:3094–3100.
- 970 Li, H., and R. Durbin. 2009. Fast and accurate short read alignment with Burrows-Wheeler transform.  
971 *25:1754–1760.*
- 972 Li, H., P. S. Zeitler, M. T. Valerius, K. Small, and S. S. Potter. 1996. Gsh $\square$ 1, an orphan Hox gene, is  
973 required for normal pituitary development. *Embo J* 15:714–724.
- 974 Lydall, D., Y. Nikolsky, D. K. Bishop, and T. Weinert. 1996. A meiotic recombination checkpoint  
975 controlled by mitotic checkpoint genes. *Nature* 383:840–843.
- 976 Malik, H. S. 2009. The Centromere-Drive Hypothesis: A Simple Basis for Centromere Complexity. Pp.  
977 33–52 in  $\text{\textcircled{D}}$ . Ugarković, ed. *Centromere, Progress in Molecular and Subcellular Biology*.
- 978 Manni, M., M. R. Berkeley, M. Seppey, F. A. Simão, and E. M. Zdobnov. 2021. BUSCO Update: Novel  
979 and Streamlined Workflows along with Broader and Deeper Phylogenetic Coverage for Scoring of  
980 Eukaryotic, Prokaryotic, and Viral Genomes. *Mol Biol Evol* 38:4647–4654.



- 981 Martinez-Perez, E., and M. P. Colaiácovo. 2009. Distribution of meiotic recombination events: talking to  
982 your neighbors. *Curr Opin Genet Dev* 19:105–112.
- 983 McClintock, B. 1938. THE PRODUCTION OF HOMOZYGOUS DEFICIENT TISSUES WITH  
984 MUTANT CHARACTERISTICS BY MEANS OF THE ABERRANT MITOTIC BEHAVIOR OF  
985 RING-SHAPED CHROMOSOMES. *Genetics* 23:315–376.
- 986 McClintock, B. 1941. THE STABILITY OF BROKEN ENDS OF CHROMOSOMES IN ZEA MAYS.  
987 *Genetics* 26:234–282.
- 988 Murchison, E. P., O. B. Schulz-Trieglaff, Z. Ning, L. B. Alexandrov, M. J. Bauer, B. Fu, M. Hims, Z.  
989 Ding, S. Ivakhno, C. Stewart, B. L. Ng, W. Wong, B. Aken, S. White, A. Alsop, J. Becq, G. R.  
990 Bignell, R. K. Cheetham, W. Cheng, T. R. Connor, A. J. Cox, Z.-P. Feng, Y. Gu, R. J. Grocock, S. R.  
991 Harris, I. Khrebtukova, Z. Kingsbury, M. Kowarsky, A. Kreiss, S. Luo, J. Marshall, D. J. McBride, L.  
992 Murray, A.-M. Pearse, K. Raine, I. Rasolonjatovo, R. Shaw, P. Tedder, C. Tregidgo, A. J. Vilella, D.  
993 C. Wedge, G. M. Woods, N. Gormley, S. Humphray, G. Schroth, G. Smith, K. Hall, S. M. J. Searle,  
994 N. P. Carter, A. T. Papenfuss, P. A. Futreal, P. J. Campbell, F. Yang, D. R. Bentley, D. J. Evers, and  
995 M. R. Stratton. 2012. Genome Sequencing and Analysis of the Tasmanian Devil and Its Transmissible  
996 Cancer. *Cell* 148:780–791.
- 997 Nachman, M. W. 2002. Variation in recombination rate across the genome: evidence and implications.  
998 *Curr Opin Genet Dev* 12:657–663.
- 999 Offield, M. F., T. L. Jetton, P. A. Labosky, M. Ray, R. W. Stein, M. A. Magnuson, B. L. Hogan, and C.  
1000 V. Wright. 1996. PDX-1 is required for pancreatic outgrowth and differentiation of the rostral  
1001 duodenum. *Development* 122:983–995.
- 1002 Paigen, K., and P. Petkov. 2010. Mammalian recombination hot spots: properties, control and evolution.  
1003 *Nat Rev Genet* 11:221–233.
- 1004 Pakes, S. P. 1969. The somatic chromosomes of the Mongolian gerbil (*Meriones unguiculatus*). Naval  
1005 Aerospace Medical Institute, Naval Aerospace Medial Center Vol 1056.
- 1006 Penagos-Puig, A., and M. Furlan-Magaril. 2020. Heterochromatin as an Important Driver of Genome  
1007 Organization. *Frontiers Cell Dev Biology* 8:579137.
- 1008 Peters, A. H. F. M., A. W. Plug, M. J. van Vugt, and P. de Boer. 1997. A drying-down technique for the  
1009 spreading of mammalian meiocytes from the male and female germline. *Chromosome Res* 5:66–68.
- 1010 Pracana, R., A. D. Hargreaves, J. F. Mulley, and P. W. H. Holland. 2020. Runaway GC Evolution in  
1011 Gerbil Genomes. *MBE* 37:2197–2210.
- 1012 Price, A. L., N. C. Jones, and P. A. Pevzner. 2005. De novo identification of repeat families in large  
1013 genomes. *Bioinformatics* 21:i351–i358.
- 1014 Qumsiyeh, M. B. 1986a. Phylogenetic Studies of the Rodent Family Gerbillidae: I. Chromosomal  
1015 Evolution in the Southern African Complex. *JMamm* 67:680–692.
- 1016 Qumsiyeh, M. B. H. 1986b. Chromosomal Evolution in the rodent family Gerbillidae.



- 1017 Rochette, N. C., A. G. Rivera-Colón, and J. M. Catchen. 2019. Stacks 2: Analytical Methods for Paired-  
1018 end Sequencing Improve RADseq-based Population Genomics. *bioRxiv* 32:314–37.
- 1019 Saksouk, N., E. Simboeck, and J. Déjardin. 2015. Constitutive heterochromatin formation and  
1020 transcription in mammals. *Epigenet Chromatin* 8:3.
- 1021 Singhal, S., E. M. Leffler, K. Sannareddy, I. Turner, O. Venn, D. M. Hooper, A. I. Strand, Q. Li, B.  
1022 Raney, C. N. Balakrishnan, S. C. Griffith, G. McVean, and M. Przeworski. 2015. Stable  
1023 recombination hotspots in birds. *Science* 350:928–932.
- 1024 Solari, A. J., and T. Ashley. 1977. Ultrastructure and behavior of the achiasmatic, telosynaptic XY pair of  
1025 the sand rat (*Psammomys obesus*). *Chromosoma* 62:319–336.
- 1026 Srikulnath, K., S. F. Ahmad, W. Singchat, and T. Panthum. 2021. Why Do Some Vertebrates Have  
1027 Microchromosomes? *Cells* 10:2182.
- 1028 Tarailo-Graovac, M., and N. Chen. 2009. Using RepeatMasker to Identify Repetitive Elements in  
1029 Genomic Sequences. *Curr Protoc Bioinform* 25:4.10.1-4.10.14.
- 1030 Tiemann-Boege, I., T. Schwarz, Y. Striedner, and A. Heissl. 2017. The consequences of sequence erosion  
1031 in the evolution of recombination hotspots. *Philosophical Transactions Royal Soc B Biological Sci*  
1032 372:20160462.
- 1033 Tilak, M.-K., F. Botero-Castro, N. Galtier, and B. Nabholz. 2018. Illumina Library Preparation for  
1034 Sequencing the GC-Rich Fraction of Heterogeneous Genomic DNA. *Genome Biology and Evolution*  
1035 10:616–622.
- 1036 Vinogradov, A. E. 2005. Dualism of gene GC content and CpG pattern in regard to expression in the  
1037 human genome: magnitude versus breadth. *Trends Genet* 21:639–643.
- 1038 Volobouev, V., V. M. Aniskin, B. Sicard, G. Dobigny, and L. Granjon. 2007. Systematics and phylogeny  
1039 of West African gerbils of the genus *Gerbilliscus* (Muridae: Gerbillinae) inferred from comparative G-  
1040 and C-banding chromosomal analyses. *Cytogenet Genome Res* 116:269–281.
- 1041 Waters, P. D., H. R. Patel, A. Ruiz-Herrera, L. Álvarez-González, N. C. Lister, O. Simakov, T. Ezaz, P.  
1042 Kaur, C. Frere, F. Grützner, A. Georges, and J. A. M. Graves. 2021. Microchromosomes are building  
1043 blocks of bird, reptile, and mammal chromosomes. *P Natl Acad Sci Usa* 118:e2112494118.
- 1044 Weiss, L., K. Mayeda, and M. Dully. 1970. The Karyotype of the Mongolian Gerbil, *Meriones*  
1045 *unguiculatus*. *Cytologia* 35:102–106.
- 1046 Withers, D. J., J. S. Gutierrez, H. Towery, D. J. Burks, J.-M. Ren, S. Previs, Y. Zhang, D. Bernal, S. Pons,  
1047 G. I. Shulman, S. Bonner-Weir, and M. F. White. 1998. Disruption of IRS-2 causes type 2 diabetes in  
1048 mice. *Nature* 391:900–904.
- 1049 Yang, F., V. Trifonov, B. L. Ng, N. Kosyakova, and N. P. Carter. 2017. Generation of Paint Probes by  
1050 Flow-Sorted and Microdissected Chromosomes. Pp. 35–52 *in* *Fluorescence In Situ Hybridization*  
1051 (FISH)—Application Guide. Springer.

- 1052 Yin, Z.-T., F. Zhu, F.-B. Lin, T. Jia, Z. Wang, D.-T. Sun, G.-S. Li, C.-L. Zhang, J. Smith, N. Yang, and  
1053 Z.-C. Hou. 2019. Revisiting avian ‘missing’ genes from de novo assembled transcripts. *Bmc*  
1054 *Genomics* 20:4.
- 1055 Zorio, D. A. R., S. Monsma, D. H. Sanes, N. L. Golding, E. W. Rubel, and Y. Wang. 2019. De novo  
1056 sequencing and initial annotation of the Mongolian gerbil (*Meriones unguiculatus*) genome. *Genomics*  
1057 111:441–449.
- 1058
