# Supplementary material for: A chromosome-assigned Mongolian gerbil genome with sequenced centromeres provides evidence of a new chromosome
Source: bioRxiv or medRxiv preprint supplement (doi:10.1101/2022.09.21.508825), 2023-03-06

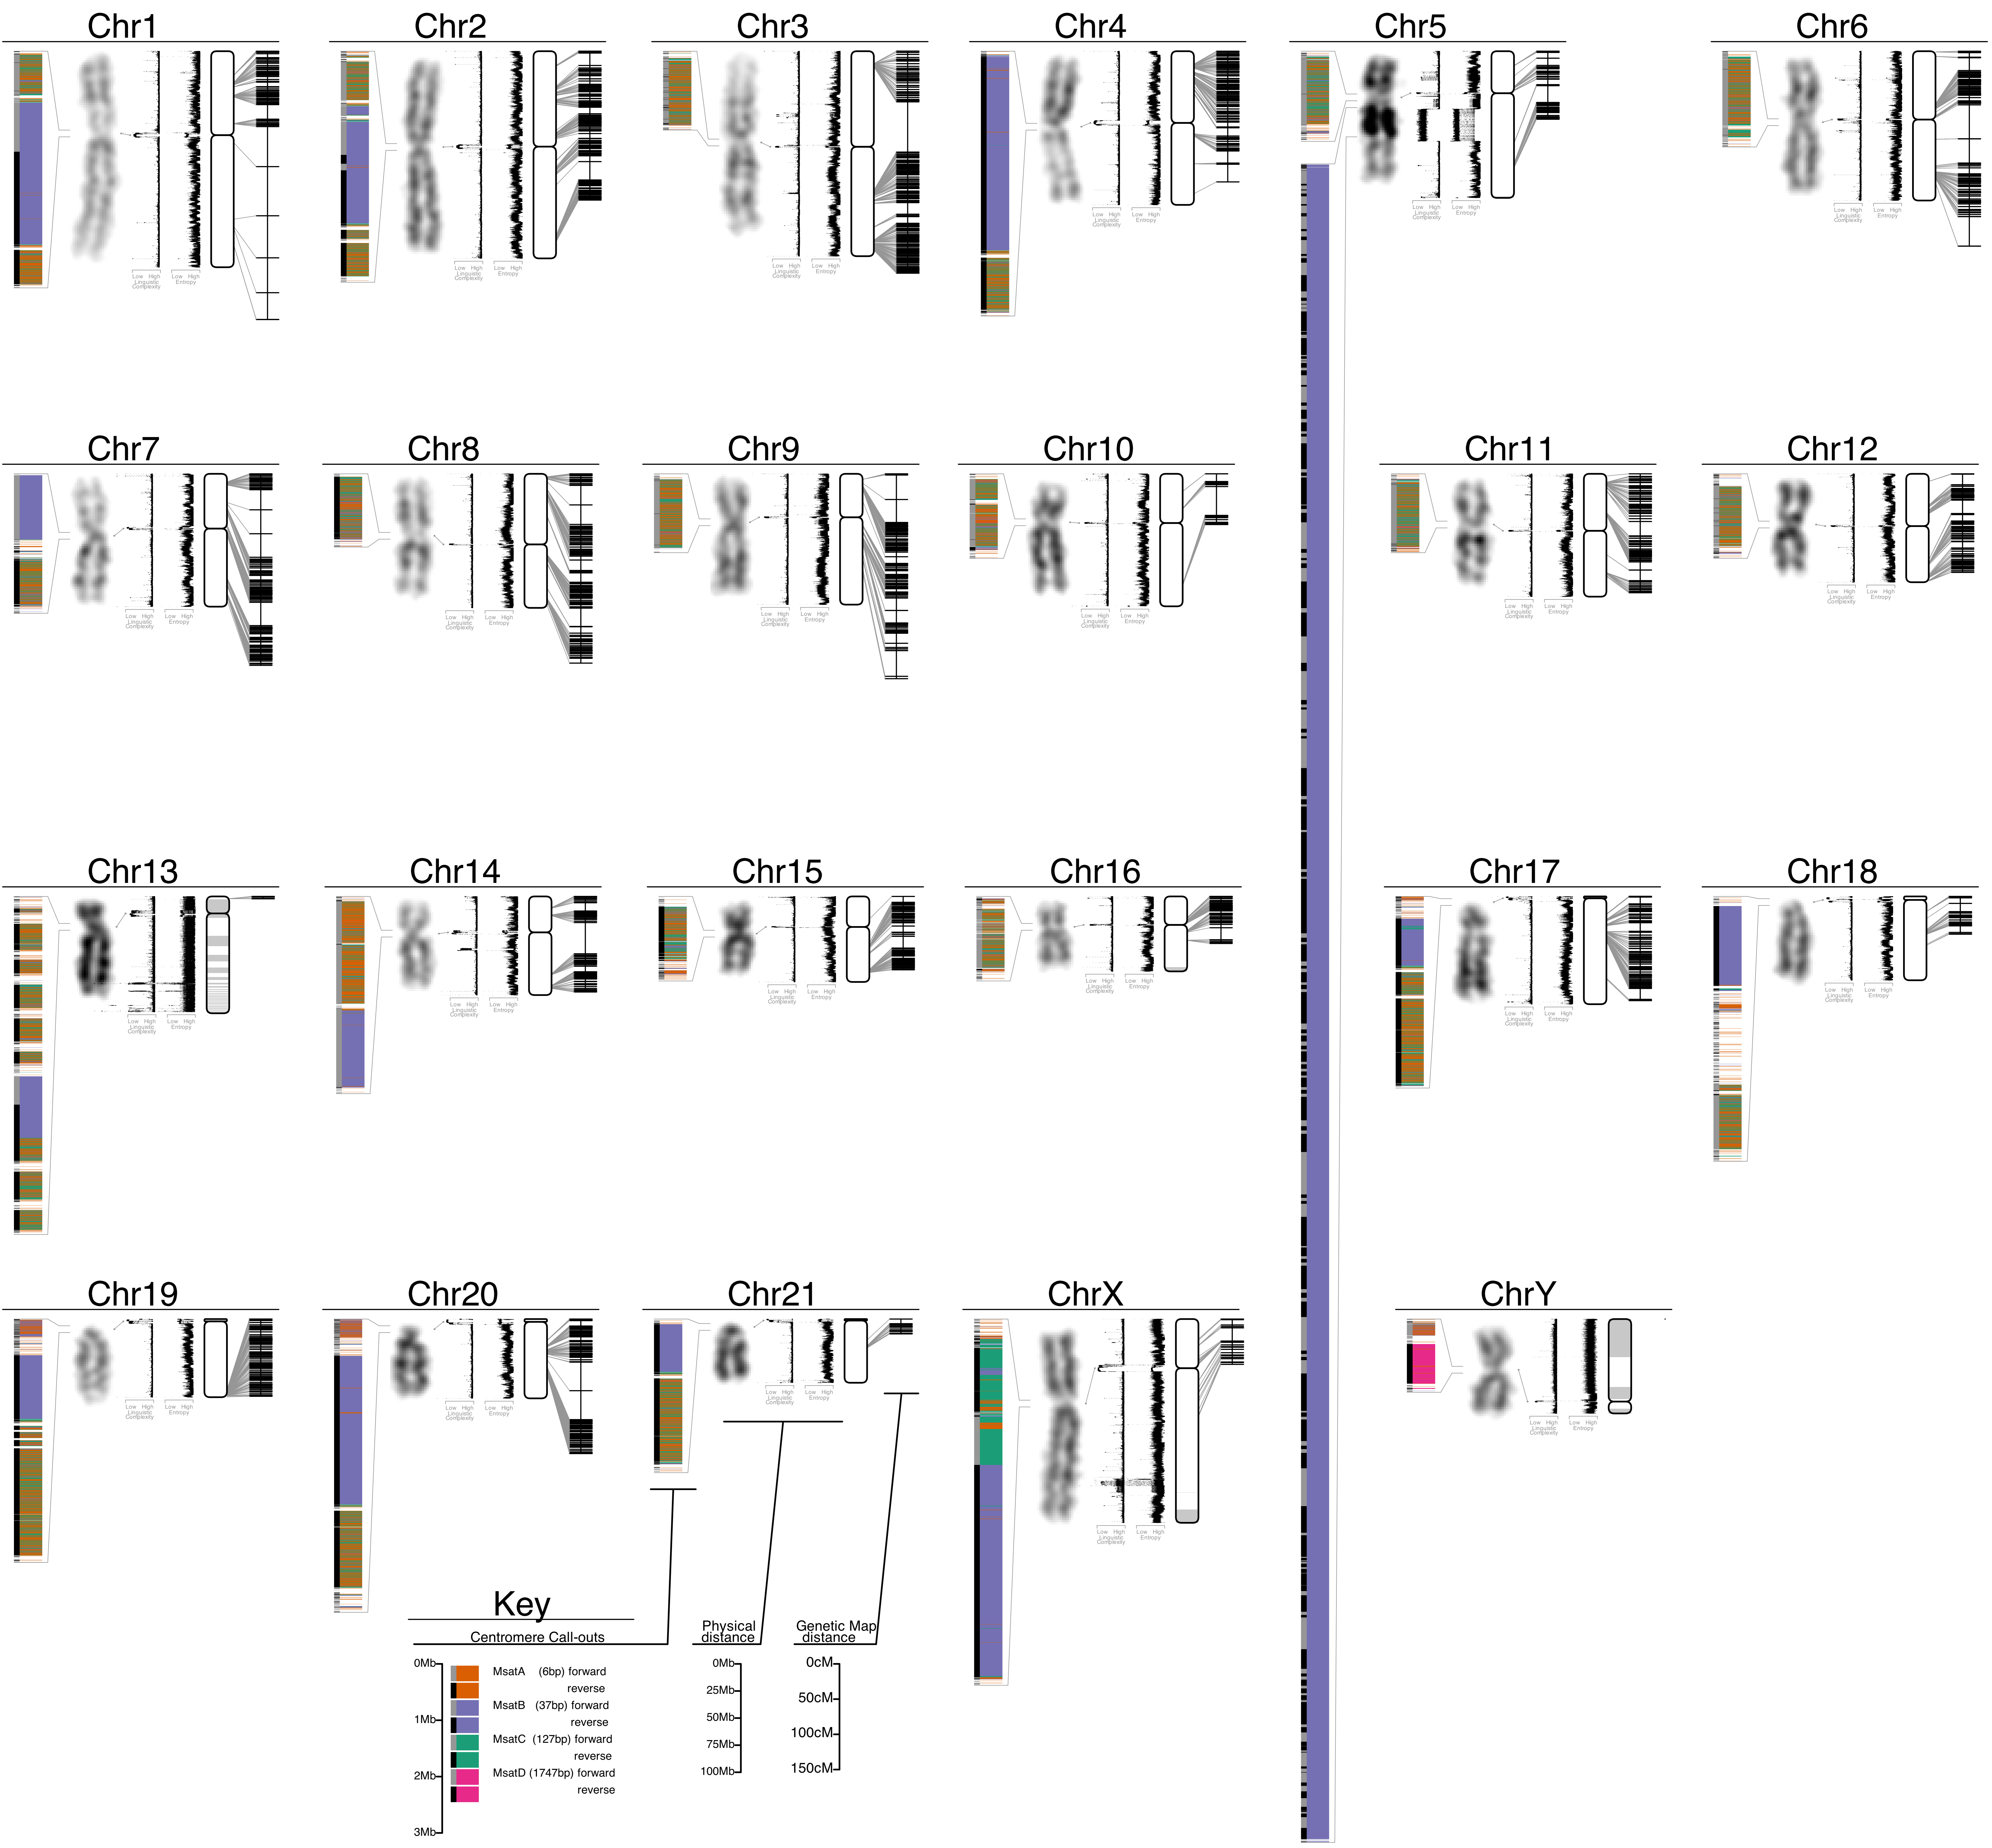

Supplement: Supplementary file [file media-3.pdf]
